# Supplementary material
Source: publisher figshare collection journal article supplement (https://gsapubs.figshare.com/ndownloader/files/23314820)
Supplement: Supplementary file 1 [file 23314820]

## Sheet: scoria size shape
Site	Lat	Long	Distance	Clast no.	Nom diam	ML	Max	Int	Min	FCR=Min/SQRT(Max times Int	Av FCR
S04-68	19.343	-155.272	8.2	1	31.0177	23.5333	42.7	27.3	25.6	0.749799	0.559621
			8.2	2	22.179		28.2	24.8	15.6	0.589894
			8.2	3	21.7002		28.3	23.6	15.3	0.592028
			8.2	4	19.9643		27.4	25.7	11.3	0.42583
			8.2	5	18.37		25.5	18.7	13	0.595323
			8.2	6	17.049		21	20.7	11.4	0.546777
			8.2	7	17.0346		27.1	15.2	12	0.591255
			8.2	8	16.6591		24.7	19.1	9.8	0.451192
			8.2	9	16.636		21.8	19.2	11	0.537668
			8.2	10	16.291		24.1	13.8	13	0.712845
			8.2	11	16.1532		25.6	16.8	9.8	0.472554
			8.2	12	15.8302		24.8	17.2	9.3	0.450291
		Dense lithic	8.2	1	26.8063	28.8667	37.3	34.2	15.1	0.422775
F4-36	19.3395	-155.277	8.5	1	19.1971	18.0267	25.7	22.2	12.4	0.519133	0.621407
			8.5	2	17.6301		24.4	19.7	11.4	0.519968
			8.5	3	17.1335		23	15.4	14.2	0.754508
			8.5	4	16.9538		21.3	18.6	12.3	0.617958
			8.5	5	16.2623		21	16	12.8	0.698297
			8.5	6	15.8426		21.8	15.2	12	0.659221
			8.5	7	15.6371		17.2	17.1	13	0.758021
			8.5	8	15.3534		20.8	15	11.6	0.656721
			8.5	9	15.3444		20.4	16.1	11	0.606966
			8.5	10	15.0566		21.5	16.2	9.8	0.525109
			8.5	11	13.8616		19.6	12.7	10.7	0.678194
			8.5	12	13.204		18.8	15.5	7.9	0.462788
S05-14	19.3434	-155.276	8.1	1	24.4044	19.8267	28.3	25.3	20.3	0.758652	0.55561
			8.1	2	18.672		21.8	18.9	15.8	0.778391
			8.1	3	18.305		24.7	19.4	12.8	0.584737
			8.1	4	18.2929		22.3	18.3	15	0.742529
			8.1	5	17.7161		23.9	16.5	14.1	0.710032
			8.1	6	17.6463		23.8	20.8	11.1	0.498888
			8.1	7	17.6418		32.8	18.6	9	0.364375
			8.1	8	16.8358		25.1	19.6	9.7	0.437328
			8.1	9	16.8091		25.7	21	8.8	0.378797
			8.1	10	16.7888		21.4	18.9	11.7	0.581766
			8.1	11	16.7298		25.9	17.9	10.1	0.469078
			8.1	12	15.925		27.7	18	8.1	0.362751
S05-15	19.3481	-155.279	7.5	1	25.8949	19.74	33.3	27.3	19.1	0.633476	0.550899
			7.5	2	18.1622		26.6	22.3	10.1	0.414694
			7.5	3	17.8737		29.6	19.1	10.1	0.424775
			7.5	4	16.2132		22.5	15.4	12.3	0.660775
			7.5	5	15.6114		21.1	16.1	11.2	0.607664
			7.5	6	15.5636		22	15.3	11.2	0.610465
			7.5	7	15.4481		21.4	16.1	10.7	0.576453
			7.5	8	14.5486		17.8	17.3	10	0.569858
			7.5	9	14.3629		25.9	13	8.8	0.47958
			7.5	10	14.3565		17.1	16.8	10.3	0.607693
			7.5	11	14.2417		20.2	14.3	10	0.588378
			7.5	12	13.3716		22.5	13.8	7.7	0.436978
S05-16	19.3396	-155.281	8.4	1	21.1491	19.98	30.3	22.3	14	0.538585	0.502635
			8.4	2	19.8552		31.2	25.6	9.8	0.34676
			8.4	3	18.9637		25.7	21.4	12.4	0.528747
			8.4	4	16.5612		20.6	21	10.5	0.504831
			8.4	5	16.4227		25.6	21.1	8.2	0.35282
			8.4	6	15.9229		24.5	15.4	10.7	0.550859
			8.4	7	15.8704		21.5	16.6	11.2	0.59285
			8.4	8	15.6307		23.4	17	9.6	0.481325
			8.4	9	15.0399		20	16.2	10.5	0.583333
			8.4	10	15.0266		19.5	15	11.6	0.678258
			8.4	11	14.7337		21.4	15.9	9.4	0.509592
			8.4	12	14.1318		27.8	14.1	7.2	0.363664
F05-2	19.3352	-155.225	10.7	1	26.2922	19.0533	32.2	26.5	21.3	0.72917	0.538329
			10.7	2	16.9195		21.5	17.6	12.8	0.658013
			10.7	3	16.5556		22.8	18.6	10.7	0.519589
			10.7	4	16.2095		23.9	16.2	11	0.559031
			10.7	5	15.9224		23.3	17.5	9.9	0.490273
			10.7	6	15.7388		19.1	18.9	10.8	0.568429
			10.7	7	15.4556		21.5	16.2	10.6	0.567975
			10.7	8	14.8213		26.6	17	7.2	0.338585
			10.7	9	13.8925		19.6	18	7.6	0.404622
			10.7	10	13.572		20.2	11.9	10.4	0.670786
			10.7	11	12.2522		19.5	13.1	7.2	0.450484
			10.7	12	11.542		17.7	11.9	7.3	0.502994
			10.7
		Lithic	10.7	1	24.1342	25.8	32.6	30.8	14	0.441818
F05-3	19.3437	-155.228	9.7	1	17.3864	16.7667	26.4	15.8	12.6	0.616936	0.629167
			9.7	2	17.2588		20	18.9	13.6	0.699509
			9.7	3	17.0212		23.8	18.5	11.2	0.533757
			9.7	4	15.2718		17.2	16.7	12.4	0.731643
			9.7	5	14.4951		19	13.7	11.7	0.725185
			9.7	6	14.2485		20.3	15	9.5	0.544415
			9.7	7	14.2434		21.1	16.5	8.3	0.444831
			9.7	8	14.0272		16	13.8	12.5	0.841222
			9.7	9	13.9739		18.7	15.2	9.6	0.569415
			9.7	10	13.257		15.8	14.6	10.1	0.664992
			9.7	11	12.9647		17.4	12.4	10.1	0.6876
			9.7	12	12.3804		20.2	12.2	7.7	0.490496
F01-46	19.3664	-155.262	5.8	1	26.6761	24.42	32.4	31	18.9	0.59636	0.568874
			5.8	2	24.1011		29.8	28.3	16.6	0.571619
			5.8	3	22.7376		30.2	22.5	17.3	0.663669
			5.8	4	22.312		35.9	23.8	13	0.444741
			5.8	5	22.0587		25.2	22.3	19.1	0.805714
			5.8	6	21.738		33.2	22.1	14	0.516848
			5.8	7	21.7096		24.4	24.1	17.4	0.71754
			5.8	8	21.7031		30.5	27.7	12.1	0.41629
			5.8	9	21.2395		28.9	24.2	13.7	0.518041
			5.8	10	20.7382		27.3	19.8	16.5	0.709692
			5.8	11	20.4871		32.8	22.6	11.6	0.426056
			5.8	12	18.6713		29.4	20.5	10.8	0.439919
		Lithic	5.8	1	22.1712	22.8333	28.8	23.8	15.9	0.607313
F6-1	19.3682	-155.263	5.5	1	35.0316	28.6067	46.7	40.2	22.9	0.528523	0.559908
			5.5	2	31.3504		37.2	33	25.1	0.716383
			5.5	3	26.1742		29.6	26	23.3	0.839892
			5.5	4	25.4138		34.9	25.7	18.3	0.611043
			5.5	5	21.2163		29.6	21.8	14.8	0.582623
			5.5	6	20.9069		28	25.3	12.9	0.484675
			5.5	7	20.4944		28.2	27.5	11.1	0.398595
			5.5	8	20.1284		31.8	22.3	11.5	0.431849
			5.5	9	19.4393		26.5	22	12.6	0.521839
			5.5	10	19.1526		26.6	18.6	14.2	0.638397
			5.5	11	18.1259		25.2	21.1	11.2	0.485709
			5.5	12	18.1223		29.3	18.3	11.1	0.479362
F4-69	19.3671	-155.264	5.7	1	39.1783	35.5467	50.5	44.6	26.7	0.562598	0.605668
			5.7	2	39.1518		52.7	43.3	26.3	0.550562
			5.7	3	33.4787		42	34.1	26.2	0.692308
			5.7	4	33.2994		44.7	42.8	19.3	0.441247
			5.7	5	25.8538		33.2	28.6	18.2	0.590635
			5.7	6	24.4616		28.7	25.5	20	0.739297
			5.7	7	22.9716		31.9	25	15.2	0.538243
			5.7	8	22.2611		25.9	22.3	19.1	0.794751
			5.7	9	21.877		30.9	25.1	13.5	0.48475
			5.7	10	21.2862		27.4	22	16	0.651678
			5.7	11	21.1744		27.2	20.9	16.7	0.700421
			5.7	12	19.7556		29.1	20.7	12.8	0.521529
			5.7
		Lithic	5.7	1	32.0822	32.6333	37.6	35.7	24.6	0.67144
WR1-1	19.3592	-155.262	6.6	1	24.1454	22.9933	42	29.4	11.4	0.324419	0.496367
			6.6	2	22.0433		30.8	21.6	16.1	0.6242
			6.6	3	21.2126		26.4	26.2	13.8	0.524719
			6.6	4	20.7823		26.6	22.8	14.8	0.600971
			6.6	5	20.147		25.6	24.2	13.2	0.53033
			6.6	6	20.0904		31.9	20.5	12.4	0.484897
			6.6	7	19.7942		28.3	18.9	14.5	0.626966
			6.6	8	19.5176		29.4	20.9	12.1	0.488133
			6.6	9	18.5273		23.1	20.7	13.3	0.60822
			6.6	10	18.2261		28.5	22.6	9.4	0.370383
			6.6	11	17.764		28.6	19.6	10	0.422366
			6.6	12	17.6919		30.4	20.7	8.8	0.350801
S04-68A	19.343	-155.272	8.2	1	24.1144	23.9533	26.4	27.1	19.6	0.732773	0.529582
			8.2	2	23.5117		36.3	23.1	15.5	0.535269
			8.2	3	22.5882		41.8	22.6	12.2	0.396933
			8.2	4	21.8327		30.5	22.9	14.9	0.563792
			8.2	5	21.7069		27.1	22.6	16.7	0.674804
			8.2	6	21.5409		29.7	21.3	15.8	0.628187
			8.2	7	21.3543		28.6	26.6	12.8	0.464073
			8.2	8	21.2703		27.3	25	14.1	0.539719
			8.2	9	20.7145		29.3	23.7	12.8	0.485738
			8.2	10	20.1053		27	21.5	14	0.581068
			8.2	11	19.7556		30.6	22.7	11.1	0.421162
			8.2	12	19.4172		35.3	22.3	9.3	0.331469
		Lithics	8.2	1	29.1824	30.7	43.6	28.5	20	0.567367
			8.2	2	28.4202	30.2333	45.5	25.1	20.1	0.594776
						30.4667
S05-23	19.3229	-155.296	10.5	1	20.2906	20.7933	28	22.1	13.5	0.542698	0.603822
			10.5	2	20.0823		23.8	20.5	16.6	0.751524
			10.5	3	19.9877		23.2	23.1	14.9	0.64363
			10.5	4	19.8414		24.7	23.6	13.4	0.555009
			10.5	5	19.2202		32.6	22	9.9	0.369671
			10.5	6	19.0884		25.2	20	13.8	0.614701
			10.5	7	18.9734		24.2	19.6	14.4	0.661191
			10.5	8	18.7712		29.1	19.1	11.9	0.504759
			10.5	9	18.6261		23.1	19.7	14.2	0.665655
			10.5	10	16.8743		19.2	17.5	14.3	0.780129
			10.5	11	16.5994		27.5	15.4	10.8	0.524804
			10.5	12	14.7993		22.7	13.1	10.9	0.632089
			10.5
		Lithic	10.5	1	20.2167	20.6	25.6	20.3	15.9	0.697476
F05-9	19.3314	-155.302	9.7	1	22.2355	20.0067	33.4	22.7	14.5	0.526601	0.614772
			9.7	2	19.0084		27.9	23.9	10.3	0.398874
			9.7	3	18.3972		24.4	16.9	15.1	0.743599
			9.7	4	18.1037		22	18.6	14.5	0.716804
			9.7	5	17.6219		27.8	14.8	13.3	0.65569
			9.7	6	17.3092		21.2	16.2	15.1	0.814801
			9.7	7	16.9794		29.7	20.1	8.2	0.335612
			9.7	8	16.9643		20.4	19.3	12.4	0.624925
			9.7	9	16.7412		23	20	10.2	0.475577
			9.7	10	16.0735		19.9	18.8	11.1	0.573875
			9.7	11	15.9671		17.9	16.6	13.7	0.794767
			9.7	12	15.1166		18.3	15.6	12.1	0.716139
F05-10	19.3169	-155.299	11.2	1	16.8954	16.38	20.8	17.7	13.1	0.682736	0.65409
			11.2	2	16.745		23	17.3	11.8	0.591555
			11.2	3	15.75		21.5	15.4	11.8	0.648489
			11.2	4	15.3037		22.1	15.3	10.6	0.576453
			11.2	5	15.0502		16.6	15.1	13.6	0.859006
			11.2	6	14.7532		19.8	15.3	10.6	0.609014
			11.2	7	14.6411		19.1	15.8	10.4	0.598671
			11.2	8	14.3796		17.8	14.4	11.6	0.724547
			11.2	9	14.0283		19.3	14.9	9.6	0.566108
			11.2	10	13.9852		17.8	12.7	12.1	0.804773
			11.2	11	13.8339		18.9	13.6	10.3	0.642446
			11.2	12	13.3344		22.2	12	8.9	0.545284
F05-11	19.3151	-155.307	11.6	1	20.1457	16.3	25.1	18.3	17.8	0.830534	0.709734
			11.6	2	16.8516		27.8	15.1	11.4	0.556409
			11.6	3	14.3397		19.8	14.6	10.2	0.599917
			11.6	4	13.8937		18.5	13.3	10.9	0.694888
			11.6	5	13.5766		17.4	14.1	10.2	0.651202
			11.6	6	12.2586		15.8	13.1	8.9	0.618623
			11.6	7	12.1899		17.8	10.6	9.6	0.698889
			11.6	8	11.7654		14.5	11.7	9.6	0.737046
			11.6	9	11.4467		13.1	10.7	10.7	0.903767
			11.6	10	11.2331		13.2	11.8	9.1	0.729144
			11.6	11	10.8531		16	9.4	8.5	0.693099
			11.6	12	10.0679		11.5	10.2	8.7	0.803286
F4-64	19.3595	-155.235	7.9	1	23.1487	22.8267	29.6	22.9	18.3	0.70289	0.684378
			7.9	2	23.014		27.6	24.4	18.1	0.697476
			7.9	3	22.7553		29.2	20.8	19.4	0.787188
			7.9	4	21.9033		27.9	21.4	17.6	0.720284
			7.9	5	21.5949		23.9	22.9	18.4	0.786504
			7.9	6	21.5651		29.8	23.7	14.2	0.534326
			7.9	7	21.2986		25.4	20.9	18.2	0.789917
			7.9	8	20.332		28.8	25.6	11.4	0.419845
			7.9	9	20.169		26	19.6	16.1	0.7132
			7.9	10	19.3011		25.3	20.3	14	0.61776
			7.9	11	18.7233		28.6	15.3	15	0.717072
			7.9	12	18.5683		22	19.4	15	0.726071
S7-103	19.3521	-155.211	10.1	1	35.4819	25.82	41.5	36	29.9	0.773563	0.640248
			10.1	2	25.3041		36.3	25.8	17.3	0.565305
			10.1	3	21.7746		35.5	22.2	13.1	0.466639
			10.1	4	21.3776		31	19.1	16.5	0.678089
			10.1	5	20.6757		26.1	20.4	16.6	0.719404
			10.1	6	19.2773		24.1	20.5	14.5	0.652353
			10.1	7	18.5906		24.1	17.2	15.5	0.761305
			10.1	8	17.6728		22.1	22.3	11.2	0.50451
			10.1	9	17.3122		21	17.4	14.2	0.742855
			10.1	10	17.2677		29.9	16.4	10.5	0.474167
			10.1	11	16.0867		22.1	16.1	11.7	0.620264
			10.1	12	15.8676		20.4	15.3	12.8	0.724518
R-13	19.3725	-155.241	6.4	1	25.028	23.92	28.2	26.6	20.9	0.763099	0.720834
			6.4	2	24.866		28.7	23.6	22.7	0.872226
			6.4	3	24.6861		29.5	24.4	20.9	0.779005
			6.4	4	21.9822		27.1	23.9	16.4	0.644407
			6.4	5	21.5659		27.1	21.9	16.9	0.693713
			6.4	6	20.6616		26.8	18.7	17.6	0.786184
			6.4	7	19.7479		27.3	21.7	13	0.534112
			6.4	8	19.6274		31.3	20.3	11.9	0.472092
			6.4	9	19.4739		23.6	18.3	17.1	0.822838
			6.4	10	19.3269		24	18.8	16	0.753244
			6.4	11	19.0999		22.5	19.6	15.8	0.752381
			6.4	12	18.3439		26.2	15.2	15.5	0.776711
F05-13	19.3542	-155.257	7.3	1	27.4862	24.32	35.6	30.7	19	0.574724	0.662129
			7.3	2	25.6327		32.2	27.1	19.3	0.653348
			7.3	3	22.8698		30	22.4	17.8	0.68665
			7.3	4	21.8947		24.5	21	20.4	0.899368
			7.3	5	21.3449		25.7	21.5	17.6	0.748733
			7.3	6	21.0356		28.8	20.2	16	0.663358
			7.3	7	20.4358		25.2	21.3	15.9	0.686289
			7.3	8	19.8204		24.7	22.2	14.2	0.606406
			7.3	9	19.7176		26	18.9	15.6	0.703732
			7.3	10	19.6402		31.1	20.3	12	0.477588
			7.3	11	19.4769		25.8	22.2	12.9	0.539018
			7.3	12	19.2908		23	20.4	15.3	0.706338
F05-14	19.3489	155.266	7.6	1	25.8205	25.3	28	26.5	23.2	0.851699	0.631543
			7.6	2	25.3223		33.3	26.5	18.4	0.619402
			7.6	3	24.4166		33.5	21.3	20.4	0.763692
			7.6	4	24.2303		33.3	26.7	16	0.53659
			7.6	5	24.0303		26.5	24.7	21.2	0.828637
			7.6	6	21.7935		31.5	26.5	12.4	0.429184
			7.6	7	21.6548		28.3	23.3	15.4	0.599721
			7.6	8	21.5685		24.9	21.9	18.4	0.787945
			7.6	9	21.5409		26.6	24.4	15.4	0.604484
			7.6	10	21.22		27.8	20.1	17.1	0.723395
			7.6	11	20.8204		35	24.1	10.7	0.368418
			7.6	12	20.6491		29.1	24.4	12.4	0.465351
F05-15	19.3348	-155.275	9	1	23.6585	22.12	33	22.8	17.6	0.641635	0.644917
			9	2	22.9431		27.8	21.4	20.3	0.832275
			9	3	22.4428		28.9	24.6	15.9	0.596322
			9	4	19.3198		22.9	23.5	13.4	0.577635
			9	5	18.6645		27.4	21	11.3	0.471079
			9	6	16.4541		23.6	15.6	12.1	0.630619
			9	7	16.2805		23.2	15	12.4	0.66471
			9	8	15.9699		21.8	15.7	11.9	0.643234
			9	9	15.3816		17.2	14.9	14.2	0.887015
			9	10	14.771		20.8	12.7	12.2	0.750631
			9	11	14.753		21.3	20.1	7.5	0.362471
			9	12	14.4641		17.1	15.8	11.2	0.681383
F05-18	19.3296	-155.275	9.6	1	27.6969	24.98	41.2	27	19.1	0.572668	0.604268
			9.6	2	27.2591		35.3	30.2	19	0.581919
			9.6	3	24.3812		32.7	24.9	17.8	0.623802
			9.6	4	21.5975		26.5	21.6	17.6	0.735636
			9.6	5	19.7447		26.2	22.6	13	0.534243
			9.6	6	17.6094		25.6	15.8	13.5	0.671251
			9.6	7	17.5586		30.8	16.9	10.4	0.455842
			9.6	8	17.5418		24.5	20.4	10.8	0.483087
			9.6	9	17.4398		21.2	18	13.9	0.711559
			9.6	10	16.4871		25.2	15.2	11.7	0.597811
			9.6	11	16.3344		22.5	14.9	13	0.710001
			9.6	12	16.2273		25.1	15.2	11.2	0.573402
F05-19	19.3637	-155.256	6.4	1	32.4434	27.7667	38	34.3	26.2	0.725709	0.684443
			6.4	2	26.1816		31	27.7	20.9	0.713223
			6.4	3	26.0948		31.6	27.7	20.3	0.68614
			6.4	4	25.9682		34.3	25.4	20.1	0.680977
			6.4	5	25.9145		29.8	29.2	20	0.678001
			6.4	6	25.652		31.5	23.4	22.9	0.843475
			6.4	7	25.0564		36.2	22.4	19.4	0.681277
			6.4	8	24.8475		35.2	28.3	15.4	0.487928
			6.4	9	24.6315		30.7	26.6	18.3	0.640385
			6.4	10	23.3097		32.6	21	18.5	0.707055
			6.4	11	23.2284		30.9	24	16.9	0.620586
			6.4	12	22.5611		29.4	21	18.6	0.748565
S05-25	19.3275	-155.223	11.5	1	21.7022	21.6933	36.1	24.2	11.7	0.395844	0.520104
			11.5	2	20.0625		35	20.6	11.2	0.41711
			11.5	3	20.0201		26.3	22.6	13.5	0.553735
			11.5	4	19.5656		25.2	19.3	15.4	0.6983
			11.5	5	18.968		31.7	23.4	9.2	0.337793
			11.5	6	18.0504		23.5	19.4	12.9	0.604164
			11.5	7	17.1524		26.7	17.5	10.8	0.499631
			11.5	8	17.0963		22.4	16.9	13.2	0.678432
			11.5	9	16.3923		22.7	19.6	9.9	0.469347
			11.5	10	16.3686		22.7	16.1	12	0.627705
			11.5	11	16.2833		22.1	17.6	11.1	0.562821
			11.5	12	15.3819		25.2	17.4	8.3	0.396372
S05-26	19.3264	-155.227	11.4	1	26.1927	21.8533	34.7	27.4	18.9	0.612945	0.533523
			11.4	2	21.0445		25.3	22.6	16.3	0.681668
			11.4	3	20.1008		28.2	22.5	12.8	0.508153
			11.4	4	20.0372		31.3	18.1	14.2	0.596591
			11.4	5	17.6694		25	18.7	11.8	0.545747
			11.4	6	17.4484		24.6	17.7	12.2	0.584663
			11.4	7	17.3214		25.1	20.5	10.1	0.445254
			11.4	8	17.2859		24.1	22.8	9.4	0.401007
			11.4	9	17.1668		23.4	18.8	11.5	0.548291
			11.4	10	16.4452		25.2	15.9	11.1	0.554529
			11.4	11	16.2101		23.3	18.1	10.1	0.491818
			11.4	12	15.9337		23.9	18.6	9.1	0.431605
S05-27	19.3252	-155.232	11.3	1	24.1125	22.34	28.9	31.5	15.4	0.510407	0.537805
			11.3	2	21.2645		31.3	24	12.8	0.467016
			11.3	3	21.0379		29.4	20.7	15.3	0.620201
			11.3	4	20.9581		31.7	24	12.1	0.438682
			11.3	5	18.8464		24.2	19.9	13.9	0.633404
			11.3	6	18.2218		24.8	21.4	11.4	0.494848
			11.3	7	17.4202		25.6	17.5	11.8	0.557498
			11.3	8	17.4015		23.2	20.1	11.3	0.523283
			11.3	9	16.7314		21.6	15.6	13.9	0.757226
			11.3	10	16.0451		31	20.5	6.5	0.257843
			11.3	11	15.7041		24.9	15.4	10.1	0.515776
			11.3	12	15.6863		21.7	14.7	12.1	0.677481
S05-28	19.3245	-155.236	11.2	1	27.1401	25.2333	47	27.8	15.3	0.423273	0.556377
			11.2	2	25.0724		43	24.6	14.9	0.458126
			11.2	3	22.603		36.3	24.1	13.2	0.446285
			11.2	4	19.9833		26.6	25	12	0.46534
			11.2	5	19.7963		31	29.1	8.6	0.286333
			11.2	6	19.5597		24.8	21.4	14.1	0.612049
			11.2	7	19.1708		27.8	19.8	12.8	0.545576
			11.2	8	18.6445		22.9	17.8	15.9	0.787534
			11.2	9	18.629		24.2	19.5	13.7	0.63066
			11.2	10	17.763		21.4	19.4	13.5	0.662561
			11.2	11	17.6105		22.4	16.7	14.6	0.754867
			11.2	12	17.0756		26.5	15.4	12.2	0.603916
S05-29	19.3251	-155.242	10.9	1	41.5411	25.92	58.3	42.4	29	0.583285	0.584915
			10.9	2	22.44		34.2	23.6	14	0.492787
			10.9	3	21.1388		27.6	18.6	18.4	0.812095
			10.9	4	19.8897		25.9	21.7	14	0.590539
			10.9	5	19.5076		27.7	20	13.4	0.569311
			10.9	6	18.8822		27.4	19.5	12.6	0.545102
			10.9	7	18.2102		24.9	17.2	14.1	0.681326
			10.9	8	17.9361		23.2	18.7	13.3	0.638538
			10.9	9	17.8787		24.5	21.8	10.7	0.462991
			10.9	10	17.5295		25	18.9	11.4	0.52445
			10.9	11	16.4648		20	17.3	12.9	0.693508
			10.9	12	16.2739		25.6	18.3	9.2	0.425052
S05-30	19.3236	-155.247	10.8	1	21.5187	20.6467	24.2	22.5	18.3	0.784246	0.628369
			10.8	2	20.14		30.1	23.6	11.5	0.431478
			10.8	3	19.4878		27.8	17.4	15.3	0.695656
			10.8	4	19.3206		25.9	23.8	11.7	0.471246
			10.8	5	18.9299		22.1	20.6	14.9	0.698323
			10.8	6	17.8983		25	16.5	13.9	0.684389
			10.8	7	17.2525		22.4	17.5	13.1	0.66165
			10.8	8	16.9217		26.8	16	11.3	0.545696
			10.8	9	16.2893		21.3	17.8	11.4	0.585471
			10.8	10	15.7664		20.2	17.8	10.9	0.574832
			10.8	11	15.3925		20.1	14.4	12.6	0.740613
			10.8	12	14.6737		21.7	13	11.2	0.666832
S05-31	19.3227	-155.271	10.4	1	25.5476	20.5867	34.8	25.9	18.5	0.616215	0.574203
			10.4	2	22.3369		31.5	24.4	14.5	0.523019
			10.4	3	18.3926		25	18.3	13.6	0.635833
			10.4	4	16.516		23.6	16.6	11.5	0.581016
			10.4	5	15.7208		24.2	16.9	9.5	0.469756
			10.4	6	15.4081		19.1	15.2	12.6	0.73949
			10.4	7	14.8801		18	17.6	10.4	0.584307
			10.4	8	14.7098		20.9	15.7	9.7	0.535487
			10.4	9	14.5387		17.9	14.8	11.6	0.71269
			10.4	10	13.6187		21.5	13.2	8.9	0.528304
			10.4	11	13.0559		23	11.8	8.2	0.497747
			10.4	12	12.9663		20.4	13.7	7.8	0.466573
S05-32	19.3239	-155.267	10.4	1	23.5564	21.2333	31.4	31.3	13.3	0.424243	0.546236
			10.4	2	21.7823		26.9	22.6	17	0.689475
			10.4	3	18.8343		30.8	18.7	11.6	0.48335
			10.4	4	18.5491		25.2	20.1	12.6	0.559851
			10.4	5	18.31		23.8	20.8	12.4	0.557316
			10.4	6	17.9464		26.7	17.6	12.3	0.567405
			10.4	7	17.8062		22	18.2	14.1	0.704648
			10.4	8	16.7872		24.7	17.9	10.7	0.508872
			10.4	9	16.2776		29.5	17.2	8.5	0.377349
			10.4	10	16.2033		19.3	20.6	10.7	0.536626
			10.4	11	15.9916		19.4	17	12.4	0.682804
			10.4	12	15.3744		23.1	17.1	9.2	0.462896
			10.4
		Lithic	10.4	1	14.7856	18.5	36.4	11.1	8	0.397995
S05-33	19.3234	-155.262	10.5	1	23.2673	21.7667	31	22.7	17.9	0.674775	0.584457
			10.5	2	21.5812		27.8	27.6	13.1	0.472927
			10.5	3	20.3815		27.1	24.6	12.7	0.491871
			10.5	4	19.2284		23.9	21.4	13.9	0.614623
			10.5	5	19.1815		29	23.4	10.4	0.399233
			10.5	6	18.5855		23.4	17.7	15.5	0.761618
			10.5	7	17.8175		24.4	17.3	13.4	0.652209
			10.5	8	17.4308		20.9	18.1	14	0.719806
			10.5	9	17.1957		29.1	17.3	10.1	0.450144
			10.5	10	16.9192		21.4	18.4	12.3	0.619854
			10.5	11	16.4219		24.4	16.5	11	0.548221
			10.5	12	16.0201		21.8	16.4	11.5	0.608202
			10.5
		Lithic	10.5	1	9.2919	13.6	26.6	2.6	11.6	1.39486
S05-34	19.3235	-155.257	10.6	1	19.2905	18.8533	24.9	22.7	12.7	0.534184	0.56035
			10.6	2	17.8866		26.6	21.3	10.1	0.424317
			10.6	3	17.7168		25	16.6	13.4	0.65778
			10.6	4	17.7024		25.6	19.7	11	0.489823
			10.6	5	17.2406		22.1	18.7	12.4	0.609965
			10.6	6	17.2031		21.5	18.5	12.8	0.641808
			10.6	7	17.1954		23.4	19.4	11.2	0.525665
			10.6	8	17.1876		21.3	17.4	13.7	0.711633
			10.6	9	16.5017		23.4	17.3	11.1	0.551686
			10.6	10	15.6806		21	18	10.2	0.524631
			10.6	11	14.9982		21.8	14.6	10.6	0.594157
			10.6	12	14.6306		21.3	16.9	8.7	0.458549
			10.6
		Lithic	10.6	1	17.6089	18.7667	25.5	20.2	10.6	0.467046
S05-35	19.3258	-155.254	10.4	1	22.3225	21.18	29	22.3	17.2	0.676359	0.565996
			10.4	2	21.4376		25.6	21.5	17.9	0.762981
			10.4	3	21.0719		27.6	22.6	15	0.600596
			10.4	4	19.0486		28.5	28.2	8.6	0.303355
			10.4	5	17.3363		24	16.7	13	0.649351
			10.4	6	16.4741		25.3	18.8	9.4	0.431011
			10.4	7	15.8021		23.6	17.6	9.5	0.466135
			10.4	8	15.6081		20.9	16.1	11.3	0.616017
			10.4	9	15.5674		21.1	14.9	12	0.676779
			10.4	10	15.195		20.8	16.7	10.1	0.541915
			10.4	11	14.4215		18.2	16	10.3	0.603589
			10.4	12	13.3505		17.6	16.9	8	0.463864
S05-36	19.3244	-155.251	10.7	1	25.5056	21.72	30.3	29.6	18.5	0.617738	0.534889
			10.7	2	20.3597		36	19.7	11.9	0.446851
			10.7	3	20.3228		27.7	21.8	13.9	0.565649
			10.7	4	18.2211		23.9	22.4	11.3	0.488377
			10.7	5	18.0567		29.9	17.9	11	0.475478
			10.7	6	17.2211		22.9	17.7	12.6	0.625844
			10.7	7	17.0332		23.8	17.9	11.6	0.562009
			10.7	8	16.7744		23.1	14.7	13.9	0.75431
			10.7	9	16.6876		22.2	17.3	12.1	0.617427
			10.7	10	16.5753		26.9	20.9	8.1	0.341614
			10.7	11	15.8818		24.6	17.7	9.2	0.440893
			10.7	12	14.7931		23.1	15.4	9.1	0.482475
S05-37	19.3204	-155.254	11	1	26.3884	22.9467	29.2	31	20.3	0.67472	0.470459
			11	2	22.5116		35	26.5	12.3	0.403876
			11	3	21.312		26.1	24.4	15.2	0.602322
			11	4	19.2932		35.7	18.8	10.7	0.41302
			11	5	19.0885		25.4	19.7	13.9	0.621391
			11	6	18.8107		25	20.8	12.8	0.561317
			11	7	18.3425		32.3	23.3	8.2	0.298906
			11	8	17.3008		23.7	23	9.5	0.406898
			11	9	16.7595		24.6	20.8	9.2	0.406714
			11	10	16.4838		24.8	21	8.6	0.376845
			11	11	14.9239		22.5	18.7	7.9	0.385137
			11	12	14.7148		23.4	14.8	9.2	0.494367
S05-38	19.3176	-155.256	11.2	1	26.738	22.6333	38.3	32.2	15.5	0.441372	0.529701
			11.2	2	20.7235		30.1	22.4	13.2	0.508355
			11.2	3	20.6305		33.2	23.2	11.4	0.410763
			11.2	4	20.0378		25.3	20	15.9	0.706841
			11.2	5	19.0854		25.6	18.6	14.6	0.669077
			11.2	6	18.0549		24	17.9	13.7	0.66098
			11.2	7	16.8791		20.8	17	13.6	0.723241
			11.2	8	16.8266		25.5	15.7	11.9	0.59474
			11.2	9	16.8009		26.3	19.6	9.2	0.405212
			11.2	10	16.3204		25	20.7	8.4	0.369253
			11.2	11	14.6466		20.8	18.2	8.3	0.42659
			11.2	12	13.8292		22.8	14.5	8	0.439986
F05-20	19.3073	-155.26	12.3	1	35.8935	27.3133	49.9	36.2	25.6	0.602331	0.53023
			12.3	2	24.9657		33	27.1	17.4	0.581845
			12.3	3	22.9252		32.7	26.7	13.8	0.467035
			12.3	4	22.7997		37.2	27	11.8	0.372331
			12.3	5	21.8764		36	22.2	13.1	0.463387
			12.3	6	21.575		26.1	24.2	15.9	0.632658
			12.3	7	21.3092		30.8	23.8	13.2	0.48754
			12.3	8	18.9428		28.9	19.6	12	0.504202
			12.3	9	16.5379		19.3	18.9	12.4	0.64925
			12.3	10	16.2548		28.9	19.3	7.7	0.326034
			12.3	11	16.0168		19.9	17.8	11.6	0.616342
			12.3	12	14.6458		17.8	15.9	11.1	0.659803
		Lithic	12.3	1	27.1802	27.9	35.3	28.3	20.1	0.635939
F05-22	19.3097	-155.251	12.3	1	22.0313	18.6933	31.4	26.4	12.9	0.448046	0.49348
			12.3	2	18.0992		25	19.6	12.1	0.546622
			12.3	3	16.6253		23.3	17.3	11.4	0.567811
			12.3	4	16.271		25.2	15.4	11.1	0.563459
			12.3	5	14.9525		26.8	12.6	9.9	0.538744
			12.3	6	14.7072		22.6	13.8	10.2	0.577572
			12.3	7	14.5949		19.2	17.6	9.2	0.500473
			12.3	8	14.165		20.1	14	10.1	0.602087
			12.3	9	13.5769		19	14.8	8.9	0.530741
			12.3	10	13.2015		21	16.6	6.6	0.353493
			12.3	11	13.0751		22.8	17.2	5.7	0.287835
			12.3	12	12.7904		18.8	15.9	7	0.404875
S05-60	19.3215	-155.222	12.1	1	17.8413	18.3667	31.3	16.8	10.8	0.470974	0.524768
			12.1	2	17.2858		25.2	16.8	12.2	0.592932
			12.1	3	17.1194		36.7	14.7	9.3	0.400397
			12.1	4	16.5222		23	18.5	10.6	0.513873
			12.1	5	15.9109		22.2	16.2	11.2	0.590587
			12.1	6	15.2717		19.7	16	11.3	0.636481
			12.1	7	15.112		19.6	14.2	12.4	0.743275
			12.1	8	14.8065		20.8	15.3	10.2	0.571772
			12.1	9	14.4449		28.2	16.7	6.4	0.294915
			12.1	10	14.4369		18.2	16.7	9.9	0.56786
			12.1	11	13.5698		19.4	16.1	8	0.452664
			12.1	12	13.5637		18.9	16.3	8.1	0.461488
			12.1
		Lithics	12.1	1	22.5488	24.3667	33.8	26.5	12.8	0.42769
			12.1	2	12.2668	12.4667	14.5	13.4	9.5	0.681533
						18.4167
S05-61	19.3186	-155.225	12.3	1	23.887	22.1867	27.9	27.6	17.7	0.637847	0.553992
			12.3	2	23.3369		25.5	25.3	19.7	0.775597
			12.3	3	21.6466		30	23	14.7	0.559619
			12.3	4	19.4345		26.7	23.7	11.6	0.461135
			12.3	5	18.7433		26.7	20.9	11.8	0.49952
			12.3	6	18.3618		28	20.1	11	0.463677
			12.3	7	18.1847		21.2	18.3	15.5	0.786934
			12.3	8	17.9234		21.8	18.6	14.2	0.705186
			12.3	9	16.633		21.9	20.6	10.2	0.480225
			12.3	10	16.5401		25.5	16.9	10.5	0.505797
			12.3	11	16.4322		25	20.4	8.7	0.385242
			12.3	12	13.9316		21	17.4	7.4	0.387122
F6-7K3	19.3669	-155.267	5.7	1	37.2581	28.0467	55.7	37.9	24.5	0.533235	0.515314
			5.7	2	25.299		34.3	28.1	16.8	0.541139
			5.7	3	23.912		34.6	22.2	17.8	0.642252
			5.7	4	22.9504		39	24.6	12.6	0.40679
			5.7	5	22.7901		34.3	23.8	14.5	0.507496
			5.7	6	19.5092		27.1	20	13.7	0.588465
			5.7	7	19.4494		24.1	21.2	14.4	0.637068
			5.7	8	19.3545		25.6	22.3	12.7	0.531534
			5.7	9	19.225		27.7	21.2	12.1	0.499318
			5.7	10	18.5239		26.3	22.8	10.6	0.432873
			5.7	11	18.3152		27.8	22.1	10	0.403442
			5.7	12	17.7842		26.8	19.8	10.6	0.460157
F01-46 (second)	19.3664	-155.262	5.8	1	36.6879	24.9	50.4	35.5	27.6	0.652499	0.577838
			5.8	2	21.1058		35	24.2	11.1	0.381401
			5.8	3	20.8826		24.8	21.6	17	0.734507
			5.8	4	20.7888		28.5	21.3	14.8	0.600689
			5.8	5	19.6282		27.7	21	13	0.539006
			5.8	6	19.3479		21.9	20.8	15.9	0.744978
			5.8	7	19.0163		29.6	24.2	9.6	0.358689
			5.8	8	18.9647		24	19.6	14.5	0.668551
			5.8	9	18.7401		23.2	19.7	14.4	0.673574
			5.8	10	17.6872		26.5	18	11.6	0.531128
			5.8	11	17.4729		23.9	18	12.4	0.597842
			5.8	12	16.829		27.2	17.7	9.9	0.451195
S05-235A	19.3655	-155.259	6	1	21.708	19.04	34.3	23.3	12.8	0.452778	0.551361
			6	2	19.5068		27.4	21.5	12.6	0.51913
			6	3	18.0422		23.5	17.6	14.2	0.698229
			6	4	15.9939		25.1	16.3	10	0.49439
			6	5	15.5631		17.1	16.7	13.2	0.78112
			6	6	15.1817		19.7	16.6	10.7	0.591693
			6	7	14.7968		20.2	16.2	9.9	0.54727
			6	8	14.7747		22.7	14.8	9.6	0.523754
			6	9	13.411		22.8	14.9	7.1	0.38521
			6	10	13.1634		18.3	15.2	8.2	0.491662
			6	11	12.7392		19	11.7	9.3	0.623754
			6	12	11.9475		18.7	12	7.6	0.507344
S05-252	19.3375	-155.281	8.7	1	17.3405	16.14	23.5	17.2	12.9	0.64164	0.566122
			8.7	2	17.017		22.7	16.2	13.4	0.69877
			8.7	3	15.3954		18.1	16	12.6	0.740408
			8.7	4	14.8856		19	15.5	11.2	0.652643
			8.7	5	13.9854		18.7	15.9	9.2	0.533542
			8.7	6	13.9808		19.5	15.4	9.1	0.525126
			8.7	7	13.5918		16.8	15.9	9.4	0.575141
			8.7	8	13.4307		16.7	16.3	8.9	0.539434
			8.7	9	12.9897		16.9	13.1	9.9	0.665359
			8.7	10	12.7762		18.3	14.8	7.7	0.46788
			8.7	11	12.5424		23.3	11.6	7.3	0.444034
			8.7	12	12.4579		21.2	16	5.7	0.30949
			8.7
		Lithic	8.7	1	11.0755	12.4	17.9	13.8	5.5	0.349942
S05-268A	19.3469	-155.233	9.2	1	24.2644	21.7467	27.9	25.1	20.4	0.770888	0.542642
			9.2	2	20.0084		34.3	19.3	12.1	0.470283
			9.2	3	19.9398		38.5	19.8	10.4	0.376678
			9.2	4	19.666		25.8	22	13.4	0.56245
			9.2	5	18.2604		27.1	16.4	13.7	0.649851
			9.2	6	17.9424		25.9	18.9	11.8	0.533336
			9.2	7	17.8241		29.4	18.7	10.3	0.439281
			9.2	8	17.6726		25.5	18.5	11.7	0.538679
			9.2	9	16.6929		21.3	17.9	12.2	0.624804
			9.2	10	16.5249		23.8	15.8	12	0.61882
			9.2	11	15.6595		24.8	15.8	9.8	0.495076
			9.2	12	15.4095		23.1	18	8.8	0.431559
R-13-K3	19.3725	-155.24	6.4	1	25.6503	21.2067	34.9	31.4	15.4	0.465204	0.560857
			6.4	2	19.487		31	21.9	10.9	0.418334
			6.4	3	19.0914		23.4	22.7	13.1	0.568395
			6.4	4	18.2686		24.7	20.4	12.1	0.539041
			6.4	5	18.1658		23.3	20.1	12.8	0.591472
			6.4	6	18.021		28.3	18.8	11	0.476893
			6.4	7	17.7803		21.1	18.5	14.4	0.728845
			6.4	8	17.3826		23.9	16.4	13.4	0.676837
			6.4	9	17.0924		23.4	22	9.7	0.427516
			6.4	10	17.0009		24.2	15.5	13.1	0.676391
			6.4	11	16.7462		22.1	17	12.5	0.644896
			6.4	12	16.3117		24.9	16.6	10.5	0.516459
S9-41-7GS	19.3735	-155.253	5.5	1	21.775	21.2933	31.4	25.1	13.1	0.466627	0.519601
			5.5	2	20.2377		24.4	21.5	15.8	0.689831
			5.5	3	19.9576		26.1	22.9	13.3	0.544018
			5.5	4	19.9419		30.2	20.2	13	0.526337
			5.5	5	19.8083		27.6	22	12.8	0.51945
			5.5	6	19.6957		25.8	22.1	13.4	0.561176
			5.5	7	19.2472		32.5	21.3	10.3	0.391477
			5.5	8	19.1482		27.4	21.9	11.7	0.477627
			5.5	9	18.2891		23.8	21.6	11.9	0.524846
			5.5	10	17.5233		23.6	20	11.4	0.524728
			5.5	11	17.1941		23.6	18.1	11.9	0.575773
			5.5	12	16.7648		25.3	19.4	9.6	0.433321
S9-41-6GS	19.3735	-155.253	5.5	1	30.8926	24.9	43.5	35.3	19.2	0.48997	0.591882
			5.5	2	23.3645		26.2	24.1	20.2	0.803882
			5.5	3	22.262		25	23.6	18.7	0.769867
			5.5	4	22.2499		27.3	26.2	15.4	0.575823
			5.5	5	21.677		32.9	21.5	14.4	0.541434
			5.5	6	20.5		24.5	23.6	14.9	0.619651
			5.5	7	20.1785		32.9	22.1	11.3	0.419068
			5.5	8	19.7267		34	21.3	10.6	0.393891
			5.5	9	19.6142		24.1	21.3	14.7	0.648812
			5.5	10	17.8119		23	19.5	12.6	0.594962
			5.5	11	17.6446		20.4	19.8	13.6	0.676692
			5.5	12	17.4854		22.5	19.8	12	0.568535
S9-41-5GS	19.3735	-155.253	5.5	1	23.3028	18.02	30.3	26.6	15.7	0.553016	0.656687
			5.5	2	16.3039		21.6	17.6	11.4	0.584685
			5.5	3	16.2404		18.8	17.8	12.8	0.699715
			5.5	4	15.9635		20	18	11.3	0.595562
			5.5	5	15.6043		21	16.3	11.1	0.599956
			5.5	6	14.7931		18.2	14.7	12.1	0.73976
			5.5	7	14.4358		17.2	15.9	11	0.665166
			5.5	8	14.3713		17.8	14.5	11.5	0.71582
			5.5	9	14.1233		18.7	13.1	11.5	0.734753
			5.5	10	14.1205		18.8	12.8	11.7	0.754227
			5.5	11	13.7511		18.7	13.5	10.3	0.64826
			5.5	12	13.5152		18.3	14.2	9.5	0.589324
S9-41-5-7composite	19.3735	-155.253	5.5	1	30.8926	25.1533	43.5	35.3	19.2	0.48997	0.587696
			5.5	2	23.3645		26.2	24.1	20.2	0.803882
			5.5	3	23.3028		30.3	26.6	15.7	0.553016
			5.5	4	22.262		25	23.6	18.7	0.769867
			5.5	5	22.2499		27.3	26.2	15.4	0.575823
			5.5	6	21.677		32.9	21.5	14.4	0.541434
			5.5	7	20.5		24.5	23.6	14.9	0.619651
			5.5	8	20.2377		24.4	21.5	15.8	0.689831
			5.5	9	20.1785		32.9	22.1	11.3	0.419068
			5.5	10	19.9576		26.1	22.9	13.3	0.544018
			5.5	11	19.9419		30.2	20.2	13	0.526337
			5.5	12	19.8083		27.6	22	12.8	0.51945
F04-24-7	19.3744	-155.227	7.2	1	13.3439	12.8	18	12	11	0.748455	0.638414
			7.2	2	12.9743		21	13	8	0.484182
			7.2	3	12.818		18	13	9	0.588348
			7.2	4	11.2082		16	11	8	0.603023
			7.2	5	10.9696		15	11	8	0.622799
			7.2	6	10.6707		15	9	9	0.774597
			7.2	7	10.5373		13	10	9	0.789352
			7.2	8	9.78195		13	9	8	0.7396
			7.2	9	8.6535		12	9	6	0.57735
			7.2	10	8.43433		12	10	5	0.456435
F04-24-8	19.3744	-155.227	7.2	1	15.9346	14.0667	17	17	14	0.823529	0.737048
			7.2	2	14.518		17	15	12	0.751469
			7.2	3	13.2761		15	13	12	0.859338
			7.2	4	13.0843		16	14	10	0.668153
			7.2	5	12.6827		17	12	10	0.70014
			7.2	6	12.4634		16	11	11	0.829156
			7.2	7	11.9114		13	13	10	0.769231
			7.2	8	11.0357		14	12	8	0.617213
			7.2	9	10.8008		14	10	9	0.760639
			7.2	10	9.93288		14	10	7	0.591608
F04-24-9	19.3744	-155.227	7.2	1	14.7881	13.9333	21	14	11	0.641533	0.700774
			7.2	2	14.0946		20	14	10	0.597614
			7.2	3	13.6798		16	16	10	0.625
			7.2	4	12.8058		15	14	10	0.690066
			7.2	5	12.4289		16	12	10	0.721688
			7.2	6	12.2716		14	12	11	0.848668
			7.2	7	12.0736		16	11	10	0.753778
			7.2	8	11.4089		15	11	9	0.700649
			7.2	9	10.8774		13	11	9	0.752618
			7.2	10	10.385		14	10	8	0.676123
F04-24-7-9combined	19.3744	-155.227	7.2	1	15.9346	14.7333	17	17	14	0.823529	0.672088
			7.2	2	14.7881		21	14	11	0.641533
			7.2	3	14.518		17	15	12	0.751469
			7.2	4	13.6798		16	16	10	0.625
			7.2	5	13.3439		18	12	11	0.748455
			7.2	6	13.0843		16	14	10	0.668153
			7.2	7	12.9743		21	13	8	0.484182
			7.2	8	12.818		18	13	9	0.588348
			7.2	9	12.8058		15	14	10	0.690066
			7.2	10	12.6827		17	12	10	0.70014
K15	19.3547	-155.24	8	1	23.8886	21.86	29.8	25.7	17.8	0.643199	0.598765
			8	2	22.2351		32.3	23.8	14.3	0.515758
			8	3	21.1194		27.2	23.4	14.8	0.586637
			8	4	19.2256		24.7	21	13.7	0.601537
			8	5	19.1413		23.9	22.4	13.1	0.566172
			8	6	18.6587		22.4	20	14.5	0.685061
			8	7	18.5639		21.9	21.8	13.4	0.613274
			8	8	18.1437		22.3	21.6	12.4	0.564992
			8	9	18.0002		24.5	20.7	11.5	0.510657
			8	10	17.7323		24	17.6	13.2	0.642262
			8	11	17.7099		26.3	17.6	12	0.55776
			8	12	17.6671		23.2	17.1	13.9	0.697867
S06-4	19.349	-155.277	7.4	1	25.3543	18.8667	36.2	26.8	16.8	0.539371	0.57887
			7.4	2	19.562		28.1	24	11.1	0.427429
			7.4	3	16.2274		21.1	16.6	12.2	0.651875
			7.4	4	14.6346		19.3	14.5	11.2	0.669507
			7.4	5	14.6023		19.7	14.5	10.9	0.644925
			7.4	6	14.2773		16.7	15.7	11.1	0.685512
			7.4	7	13.6761		15.4	15.1	11	0.721346
			7.4	8	13.4922		19	13.9	9.3	0.572267
			7.4	9	13.3518		17.6	14.7	9.2	0.571969
			7.4	10	13.3051		17.2	16.7	8.2	0.483828
			7.4	11	13.1737		18.5	16.7	7.4	0.421005
			7.4	12	12.9927		18.6	13.4	8.8	0.557409
S06-5A	19.3474	-155.258	7.9	1	31.1808	25.88	44.3	32.9	20.8	0.544833	0.531051
			7.9	2	26.8635		33.7	29.5	19.5	0.618456
			7.9	3	22.8238		28.9	22	18.7	0.74162
			7.9	4	20.0565		40.6	20.7	9.6	0.331149
			7.9	5	19.8395		34.1	22.9	10	0.357853
			7.9	6	18.4297		25.3	17.8	13.9	0.655005
			7.9	7	18.2396		26.5	21.4	10.7	0.449318
			7.9	8	17.9389		25.6	20.5	11	0.480171
			7.9	9	17.9235		21.2	19.4	14	0.690334
			7.9	10	17.6407		23.4	25.5	9.2	0.376626
			7.9	11	17.3403		19.9	19.7	13.3	0.671726
			7.9	12	14.0197		20	16.6	8.3	0.455522
S04-118	19.3521	-155.211	10.2	1	22.946	21.3	33.7	23.9	15	0.528539	0.59532
			10.2	2	20.2291		28.9	23.1	12.4	0.479918
			10.2	3	19.8428		26.2	21.3	14	0.592635
			10.2	4	19.7666		27.3	20.5	13.8	0.583339
			10.2	5	18.9868		28.2	16.4	14.8	0.688201
			10.2	6	18.305		27.4	18.5	12.1	0.537433
			10.2	7	17.4784		25.8	19.9	10.4	0.458983
			10.2	8	17.4453		20.4	16.9	15.4	0.829397
			10.2	9	16.2705		21.5	15.9	12.6	0.681479
			10.2	10	15.4545		20.4	16.6	10.9	0.592321
			10.2	11	15.0311		19.3	16.6	10.6	0.592206
			10.2	12	14.8202		22.1	14.3	10.3	0.579393
S06-15A	19.3102	-155.218	13.5	1	15.4061	14.9867	19.6	17.6	10.6	0.570718	0.550747
			13.5	2	14.9442		23.1	17.2	8.4	0.421414
			13.5	3	13.9396		26.4	11.4	9	0.518786
			13.5	4	13.301		18.4	14.7	8.7	0.528995
			13.5	5	12.8059		15.7	15.2	8.8	0.569654
			13.5	6	12.0485		18.2	15.5	6.2	0.369139
			13.5	7	11.6435		16.8	11.6	8.1	0.580232
			13.5	8	11.1247		14.6	11.5	8.2	0.632832
			13.5	9	10.7379		13.3	10.7	8.7	0.729292
			13.5	10	10.7376		12.8	10.4	9.3	0.806049
			13.5	11	10.1289		15.1	11.1	6.2	0.478897
			13.5	12	9.53159		18.3	9.1	5.2	0.402956
S06-16A	19.3058	-155.223	13.6	1	23.2105	20.5533	28.3	26.3	16.8	0.615798	0.54712
			13.6	2	20.7395		26.6	25.6	13.1	0.502008
			13.6	3	20.2749		24.6	22	15.4	0.661975
			13.6	4	17.501		23.6	20.1	11.3	0.518829
			13.6	5	17.3016		23.9	19.7	11	0.506945
			13.6	6	14.7383		17.6	17	10.7	0.61859
			13.6	7	14.5414		17.7	17.2	10.1	0.578856
			13.6	8	13.6358		19	13.9	9.6	0.590727
			13.6	9	12.9588		18.6	13	9	0.578781
			13.6	10	12.4223		20.3	13.3	7.1	0.4321
			13.6	11	11.959		20.4	13.1	6.4	0.391498
			13.6	12	11.7916		17.3	11.7	8.1	0.569337
S06-17A	19.3001	-155.228	14	1	19.4671	17.06	27.5	19.3	13.9	0.603351	0.517089
			14	2	16.6466		27	20.1	8.5	0.364871
			14	3	15.3798		19.5	17.6	10.6	0.572179
			14	4	14.9821		18.8	17.2	10.4	0.578349
			14	5	14.2302		20.3	16.7	8.5	0.46165
			14	6	13.9792		21.9	19.8	6.3	0.302542
			14	7	13.9416		19.4	14.4	9.7	0.58035
			14	8	13.2432		19.6	15	7.9	0.460737
			14	9	12.9952		18	12.7	9.6	0.634941
			14	10	12.6807		16.1	14.9	8.5	0.548798
			14	11	11.743		18.9	11.9	7.2	0.480096
			14	12	11.4496		13.7	13.2	8.3	0.617207
S06-18A	19.2912	-155.228	14.9	1	14.8101	14.3933	20.5	13.9	11.4	0.675337	0.591906
			14.9	2	14.782		20	17	9.5	0.51521
			14.9	3	14.445		23.3	14.7	8.8	0.475495
			14.9	4	12.389		16.1	12.7	9.3	0.650381
			14.9	5	12.2296		17.5	13.4	7.8	0.509358
			14.9	6	11.909		15.3	13.3	8.3	0.581844
			14.9	7	10.6718		12.6	10.6	9.1	0.787414
			14.9	8	10.3404		12.6	11.7	7.5	0.617708
			14.9	9	9.10398		13.1	9	6.4	0.589418
			14.9	10	8.71632		11.8	9.2	6.1	0.585457
			14.9	11	8.42021		12.8	8.8	5.3	0.499378
			14.9	12	7.73623		10.6	7.8	5.6	0.615868
S06-20A	19.2888	-155.237	14.9	1	8.47914	8.32	11.5	9.3	5.7	0.551169	0.574087
			14.9	2	8.3731		10.6	7.8	7.1	0.780833
			14.9	3	7.79481		10.9	7.9	5.5	0.592701
			14.9	4	7.77498		10	9.4	5	0.515711
			14.9	5	7.71765		10.4	8.5	5.2	0.553066
			14.9	6	7.61166		10	9	4.9	0.516505
			14.9	7	7.16285		10	7.5	4.9	0.565803
			14.9	8	6.96708		8.8	6.3	6.1	0.819253
			14.9	9	6.96314		9.1	7	5.3	0.664058
			14.9	10	6.92505		10.8	7.5	4.1	0.455556
			14.9	11	6.58154		8.5	7.8	4.3	0.528095
			14.9	12	6.08355		9.5	7.9	3	0.346295
S06-21A	19.2867	-155.243	14.9	1	22.5376	14.4733	26	25.9	17	0.655107	0.54736
			14.9	2	12.882		16.5	16.4	7.9	0.480245
			14.9	3	12.0301		15.9	15	7.3	0.472692
			14.9	4	11.8387		14.2	12.3	9.5	0.718831
			14.9	5	10.4916		15.3	11.1	6.8	0.521797
			14.9	6	10.1187		14.3	10.5	6.9	0.563101
			14.9	7	10.0957		17.5	12	4.9	0.338132
			14.9	8	9.89403		14.4	11.8	5.7	0.437273
			14.9	9	9.88536		12.5	11.2	6.9	0.583156
			14.9	10	9.85456		14.5	11	6	0.475085
			14.9	11	9.37358		11.6	10	7.1	0.659218
			14.9	12	8.54294		10.9	8.8	6.5	0.66368
S06-23A	19.2861	-155.254	14.7	1	14.7336	14.7533	16.8	16.7	11.4	0.6806	0.556919
			14.7	2	14.5275		20.9	16.3	9	0.487613
			14.7	3	13.7544		16	13.9	11.7	0.784546
			14.7	4	13.7158		21.9	13.7	8.6	0.496496
			14.7	5	13.7156		21.7	14.5	8.2	0.462275
			14.7	6	13.5596		19.4	18.1	7.1	0.378894
			14.7	7	12.8222		20.7	13.4	7.6	0.456327
			14.7	8	12.7247		19.2	14.7	7.3	0.434524
			14.7	9	11.114		13	12	8.8	0.704564
			14.7	10	9.93478		13.6	10.3	7	0.591439
			14.7	11	9.91102		14.3	9.2	7.4	0.645163
			14.7	12	9.11933		13.9	8.8	6.2	0.560587
S06-22B	19.2877	-155.249	14.6	1	12.9271	11.3693	18.1	15.5	7.7	0.459712	0.558484
			14.6	2	12.0854		15.5	14.6	7.8	0.518504
			14.6	3	11.1551		13.9	13.14	7.6	0.562352
			14.6	4	10.1985		13.2	9.8	8.2	0.720964
			14.6	5	8.29134		10	9.5	6	0.615587
			14.6	6	8.0291		9.1	7.9	7.2	0.849177
			14.6	7	7.66965		12.2	8.6	4.3	0.419797
			14.6	8	7.5056		9	8.1	5.8	0.679304
			14.6	9	7.46068		11.3	7.5	4.9	0.532263
			14.6	10	7.31146		14.1	6.3	4.4	0.466845
			14.6	11	6.58235		9.4	7.4	4.1	0.491591
			14.6	12	6.41653		10.5	7.4	3.4	0.385717
S06-19A	19.2896	-155.235	14.8	1	17.0795	11.6	24.9	18.7	10.7	0.495865	0.535841
			14.8	2	9.60674		14.3	12.4	5	0.375484
			14.8	3	9.59577		16.1	9.8	5.6	0.445823
			14.8	4	9.5781		13.6	9.1	7.1	0.638217
			14.8	5	8.79076		10.4	9.2	7.1	0.725851
			14.8	6	8.7518		11.5	8.7	6.7	0.669833
			14.8	7	8.73728		12.7	10.1	5.2	0.459135
			14.8	8	8.63036		10.8	9.6	6.2	0.608898
			14.8	9	8.57968		11.3	8.1	6.9	0.721219
			14.8	10	8.25296		13	9.2	4.7	0.429766
			14.8	11	7.73571		12.7	8.1	4.5	0.443678
			14.8	12	7.7123		12.7	8.4	4.3	0.41632
S06-24A	19.2831	-155.26	14.9	1	12.1671	11.3933	15.8	11.4	10	0.745108	0.49164
			14.9	2	11.9414		17.2	16.5	6	0.35616
			14.9	3	11.7379		14.9	13.4	8.1	0.573244
			14.9	4	8.7623		15	11.5	3.9	0.296941
			14.9	5	8.71318		12.5	8.4	6.3	0.614817
			14.9	6	8.60722		11.3	9.9	5.7	0.538912
			14.9	7	7.93802		11.2	7.7	5.8	0.624559
			14.9	8	7.69241		10.9	8.7	4.8	0.492911
			14.9	9	7.66171		9.9	7.7	5.9	0.675755
			14.9	10	7.10587		13.8	10.4	2.5	0.208681
			14.9	11	7.01399		14.2	9	2.7	0.238835
			14.9	12	6.53488		11	5.9	4.3	0.53376
S06-25	19.3094	-155.308	12.2	1	14.4436	12.8133	18	13.5	12.4	0.79546	0.583806
			12.2	2	13.3328		16.2	15.4	9.5	0.601459
			12.2	3	12.5688		17.2	15.6	7.4	0.451757
			12.2	4	11.1184		13.1	12.2	8.6	0.680272
			12.2	5	10.9678		12.4	11.2	9.5	0.806128
			12.2	6	10.9592		15.4	11.1	7.7	0.588937
			12.2	7	10.6392		14.1	11.7	7.3	0.568356
			12.2	8	10.5967		13.4	12	7.4	0.583564
			12.2	9	10.3578		17.9	9.7	6.4	0.485699
			12.2	10	10.1559		15.9	12.2	5.4	0.387717
			12.2	11	9.56338		12.7	9.7	7.1	0.639692
			12.2	12	8.78403		13.3	10.4	4.9	0.416633
S06-26	19.3145	-155.312	11.8	1	13.0705	11.6533	15.5	14.7	9.8	0.649234	0.58285
			11.8	2	11.5309		16.9	14.4	6.3	0.403846
			11.8	3	10.8435		12.5	12	8.5	0.694022
			11.8	4	10.6114		12.6	10.9	8.7	0.742371
			11.8	5	10.1614		14.5	10.8	6.7	0.535401
			11.8	6	10.0426		15.9	13	4.9	0.340821
			11.8	7	9.89899		13.8	9.9	7.1	0.607437
			11.8	8	9.85662		12	10.5	7.6	0.677062
			11.8	9	9.75176		12	11.2	6.9	0.595182
			11.8	10	9.52544		12.4	8.5	8.2	0.798718
			11.8	11	9.23239		11.7	11.4	5.9	0.510866
			11.8	12	7.78775		12.8	8.2	4.5	0.439239
S06-27	19.312	-155.313	12.1	1	11.3897	10.72	14.6	11	9.2	0.725964	0.562336
			12.1	2	10.5048		13.8	11.2	7.5	0.603271
			12.1	3	10.4925		15.1	10.2	7.5	0.604328
			12.1	4	10.0215		13	9.8	7.9	0.69991
			12.1	5	9.66721		13.6	9.1	7.3	0.656195
			12.1	6	9.46763		12	10.4	6.8	0.608698
			12.1	7	9.17026		12.9	9.8	6.1	0.542528
			12.1	8	8.9053		13.3	9	5.9	0.539268
			12.1	9	8.74801		13.5	8.7	5.7	0.525955
			12.1	10	8.21989		16.5	9.9	3.4	0.266023
			12.1	11	8.11866		13.7	9.3	4.2	0.37209
			12.1	12	9.23875		11.6	10.3	6.6	0.603804
S06-30	19.2795	-155.264	15.3	1	9.65642	8.18	14.1	10.3	6.2	0.514474	0.622022
			15.3	2	8.72015		11.5	9.3	6.2	0.599517
			15.3	3	8.30349		12.4	8.1	5.7	0.56875
			15.3	4	6.34535		7.9	6.6	4.9	0.678595
			15.3	5	5.75744		9.6	7.1	2.8	0.339151
			15.3	6	5.25738		6.9	5.4	3.9	0.638915
			15.3	7	5.11804		7.2	4.9	3.8	0.639763
			15.3	8	4.95208		6	4.6	4.4	0.837526
			15.3	9	4.65393		6.3	5	3.2	0.570157
			15.3	10	4.58248		5.4	5.4	3.3	0.611111
			15.3	11	4.49926		5.5	4.6	3.6	0.715718
			15.3	12	4.47991		5.4	4.5	3.7	0.750583
S06-35	19.2901	-155.277	14	1	10.0948	9.92	12.4	12.2	6.8	0.552864	0.608322
			14	2	9.9219		12.6	11.4	6.8	0.567376
			14	3	9.64899		10.6	11.3	7.5	0.685282
			14	4	9.53769		13	9.4	7.1	0.642278
			14	5	9.0637		11.7	8.6	7.4	0.737717
			14	6	9.05684		11.5	8.5	7.6	0.768697
			14	7	8.215		14	8.8	4.5	0.405422
			14	8	7.81362		12.9	8.6	4.3	0.408248
			14	9	7.66606		10.3	8.1	5.4	0.591198
			14	10	6.99155		8.9	6.4	6	0.794998
			14	11	6.78134		9	7.7	4.5	0.540562
			14	12	6.70858		8.5	7.4	4.8	0.605224
S06-31	19.2781	-155.271	15.4	1	11.7914	8.68	13.8	12	9.9	0.769316	0.605278
			15.4	2	11.4821		14.5	12	8.7	0.659545
			15.4	3	6.86542		8.5	8.1	4.7	0.56643
			15.4	4	6.74707		10.3	7.1	4.2	0.491136
			15.4	5	5.34988		6.6	5.8	4	0.646508
			15.4	6	5.21588		7.5	4.4	4.3	0.748534
			15.4	7	5.10152		7.1	5.5	3.4	0.544087
			15.4	8	4.4814		7.2	5	2.5	0.416667
S06-41	19.3103	-155.209	13.9	1	17.0103	14.3067	19.6	17.2	14.6	0.795171	0.589064
			13.9	2	13.7162		19.2	14	9.6	0.58554
			13.9	3	13.5		17.4	14	10.1	0.647117
			13.9	4	12.5419		17.1	13.9	8.3	0.53836
			13.9	5	12.3573		16.8	15.6	7.2	0.44475
			13.9	6	11.8781		13.8	13.2	9.2	0.68165
			13.9	7	11.7399		15.5	14.3	7.3	0.490331
			13.9	8	11.1693		15.4	11.6	7.8	0.583587
			13.9	9	10.0465		12.5	10.4	7.8	0.684105
			13.9	10	9.83322		14.7	9.8	6.6	0.549885
			13.9	11	9.61666		14.7	12.1	5	0.374903
			13.9	12	9.57376		11.7	10	7.5	0.693375
S06-42	19.3034	-155.211	14.5	1	15.893	13.34	20	19.3	10.4	0.529346	0.506568
			14.5	2	15.1027		18.3	18.1	10.4	0.571437
			14.5	3	12.6038		15.8	14.4	8.8	0.583409
			14.5	4	10.7719		14.4	12.4	7	0.523849
			14.5	5	9.90884		14.1	9.2	7.5	0.658503
			14.5	6	8.23717		10.8	7.5	6.9	0.766667
			14.5	7	7.75367		14.1	8.7	3.8	0.343095
			14.5	8	7.51044		13.6	8.9	3.5	0.318129
			14.5	9	7.21109		12.6	9.3	3.2	0.295613
			14.5	10	7.08968		12.8	8.7	3.2	0.303239
			14.5	11	6.79053		10.3	8	3.8	0.41862
			14.5	12	6.68384		8.6	6.2	5.6	0.766907
S06-43	19.2965	-155.214	15	1	16.2488	13.7067	22.4	16.8	11.4	0.58766	0.530017
			15	2	12.953		16.8	14.7	8.8	0.559976
			15	3	12.594		16.4	14.5	8.4	0.54472
			15	4	12.1232		17.9	12.6	7.9	0.526036
			15	5	12.0158		15.8	12.2	9	0.648237
			15	6	11.5493		15.8	13	7.5	0.523312
			15	7	11.2135		13.7	12.4	8.3	0.636806
			15	8	11.1612		15.7	12.3	7.2	0.51812
			15	9	10.7225		16	11.5	6.7	0.493931
			15	10	10.4281		15	12.6	6	0.436436
			15	11	10.1799		14.4	11.1	6.6	0.522037
			15	12	9.63042		18.6	9.8	4.9	0.362933
S06-44	19.2901	-155.212	15.7	1	13.2508	11.3	15.1	14.4	10.7	0.725628	0.60081
			15.7	2	10.7282		14.8	10.3	8.1	0.656048
			15.7	3	10.5351		14	9.6	8.7	0.750446
			15.7	4	10.2914		15.2	10.1	7.1	0.573028
			15.7	5	10.0303		14	10.6	6.8	0.558203
			15.7	6	9.74923		16.2	8.8	6.5	0.544395
			15.7	7	8.5335		11.4	7.9	6.9	0.727082
			15.7	8	8.51253		12.3	8.5	5.9	0.577019
			15.7	9	8.32931		13.7	7.4	5.7	0.566107
			15.7	10	7.70122		12.5	8.7	4.2	0.402749
			15.7	11	6.81094		9.8	6.2	5.2	0.667105
			15.7	12	6.35938		9.4	7.2	3.8	0.461906
S06-45	19.2809	-155.209	16.8	1	8.20967	7.89333	10.6	9	5.8	0.593819	0.56623
			16.8	2	7.86181		11.6	7.1	5.9	0.65012
			16.8	3	7.77705		13.9	7.2	4.7	0.469812
			16.8	4	7.11062		10.7	9.6	3.5	0.345335
			16.8	5	6.16361		7.9	5.7	5.2	0.774912
			16.8	6	6.05708		7.6	6.8	4.3	0.598146
			16.8	7	5.88359		7.3	6.2	4.5	0.668891
			16.8	8	5.77788		9.4	5.7	3.6	0.491814
			16.8	9	5.64433		7.4	5.4	4.5	0.711868
			16.8	10	5.45136		9	6	3	0.408248
			16.8	11	5.31582		6.7	5.9	3.8	0.604394
			16.8	12	4.74761		8.2	4.5	2.9	0.477403
			16.8
		Lithic	16.8	1	9.01597	9.1	10.8	8.7	7.8	0.80468
			16.8	2	5.60843	5.66667	6.5	5.9	4.6	0.742806
			16.8	3	6.24666	6.33333	7.5	6.5	5	0.716115
						7.03333
S06-46A	19.2769	-155.208	17.2	1	7.07772	6.34667	10.2	7.9	4.4	0.490161	0.526874
			17.2	2	5.96631		8.1	5.7	4.6	0.676983
			17.2	3	5.92763		8.7	6.3	3.8	0.513279
			17.2	4	5.62961		8.4	5.9	3.6	0.511372
			17.2	5	5.56647		7.7	6.4	3.5	0.498578
			17.2	6	5.24148		7.2	5	4	0.666667
			17.2	7	4.92831		6	5.7	3.5	0.598487
			17.2	8	4.89089		6.2	5.1	3.7	0.657992
			17.2	9	4.78498		6.3	4.7	3.7	0.679959
			17.2	10	4.29156		7.6	6.5	1.6	0.227644
			17.2	11	4.15021		7.4	4.2	2.3	0.41256
			17.2	12	3.75439		6.3	4.2	2	0.388808
S06-48A	19.2761	-155.215	17	1	16.7381	12.2067	20.5	18.3	12.5	0.645368	0.489509
			17	2	12.6747		16	12.6	10.1	0.711338
			17	3	11.0135		14.6	12.2	7.5	0.561959
			17	4	9.83235		13.8	8.4	8.2	0.761614
			17	5	9.19836		12.1	9.6	6.7	0.621651
			17	6	8.55687		15.3	9.1	4.5	0.38137
			17	7	8.42494		11.5	10	5.2	0.484903
			17	8	8.21737		13.6	10.2	4	0.339618
			17	9	7.41793		13.3	9.3	3.3	0.29672
			17	10	7.36708		9.8	8.5	4.8	0.525919
			17	11	7.19588		16.4	7.1	3.2	0.296551
			17	12	7.11062		12	10.7	2.8	0.247102
S06-59	19.2787	-155.25	15.6	1	11.9647	10.7267	15.4	13.4	8.3	0.577784	0.576154
			15.6	2	10.6275		15.5	12.1	6.4	0.467328
			15.6	3	10.1748		13.3	9.9	8	0.697183
			15.6	4	9.82457		13.3	11.5	6.2	0.501322
			15.6	5	8.87288		12.6	8.4	6.6	0.641533
			15.6	6	8.17915		10.6	8.9	5.8	0.597145
			15.6	7	7.57257		9.2	8	5.9	0.687722
			15.6	8	7.44973		10.7	6.9	5.6	0.651736
			15.6	9	7.23685		9.6	8.4	4.7	0.523387
			15.6	10	7.0986		10	7.3	4.9	0.573502
			15.6	11	7.08075		8.6	8.6	4.8	0.55814
			15.6	12	4.8617		7.2	5.7	2.8	0.437073
S06-60A	19.2722	-155.252	16.2	1	15.0074	13.36	21.7	17.7	8.8	0.449021	0.580735
			16.2	2	13.8378		16.4	15.1	10.7	0.679944
			16.2	3	13.4039		18.7	13.7	9.4	0.587282
			16.2	4	11.6955		19.6	10.6	7.7	0.534207
			16.2	5	9.74734		13.5	9.8	7	0.608581
			16.2	6	9.54017		12.1	9.2	7.8	0.739278
			16.2	7	9.48885		12.4	10.6	6.5	0.566956
			16.2	8	9.17542		12.1	11.4	5.6	0.476807
			16.2	9	9.17376		15.6	10.1	4.9	0.390367
			16.2	10	8.90228		11.7	9	6.7	0.652921
			16.2	11	8.46011		11.6	8.7	6	0.597259
			16.2	12	7.19815		9	7.4	5.6	0.6862
S06-60A*	19.2722	-155.252	16.2	1	7.39765	7.04	10.2	8.1	4.9	0.53908	0.632615
			16.2	2	6.98186		9.1	8.5	4.4	0.500291
			16.2	3	6.89209		8.7	7.1	5.3	0.674353
			16.2	4	6.61075		7.9	6.9	5.3	0.717857
			16.2	5	6.29018		8	6.1	5.1	0.730063
			16.2	6	5.87517		8.7	6.3	3.7	0.499772
			16.2	7	5.86359		9	5.6	4	0.563436
			16.2	8	5.73879		6.3	6	5	0.81325
			16.2	9	5.59813		6.8	6	4.3	0.673191
			16.2	10	5.0613		6.3	4.9	4.2	0.755929
			16.2	11	4.59028		6.5	4.8	3.1	0.554989
			16.2	12	4.22248		5.9	4.4	2.9	0.569175
S06-63A	19.2716	-155.232	16.8	1	8.86997	8.21333	12.8	9.4	5.8	0.528761	0.549061
			16.8	2	7.99691		11.7	9.3	4.7	0.450571
			16.8	3	7.90393		12.7	7.2	5.4	0.56471
			16.8	4	7.29321		9.1	8.7	4.9	0.550701
			16.8	5	6.86263		10.1	6.4	5	0.621898
			16.8	6	6.75843		9	7	4.9	0.617342
			16.8	7	6.67212		8.4	6.8	5.2	0.688033
			16.8	8	6.57027		9.7	6.8	4.3	0.529454
			16.8	9	5.92609		9.4	5.4	4.1	0.57547
			16.8	10	5.514		8.7	4.7	4.1	0.641173
			16.8	11	5.47895		8.9	6.6	2.8	0.365335
			16.8	12	5.40703		9.5	5.2	3.2	0.455288
		Lithic	16.8	1	7.86046	8.23333	10.7	8.9	5.1	0.522617
S06-65A	19.2687	-155.218	17.6	1	8.94082	8.41333	10.2	9.1	7.7	0.799227	0.602209
			17.6	2	8.84612		13.4	8.2	6.3	0.601009
			17.6	3	8.05141		11.9	8.6	5.1	0.504136
			17.6	4	7.71384		10	8.5	5.4	0.585712
			17.6	5	6.87443		9.1	8.5	4.2	0.47755
			17.6	6	6.76343		8.2	7.7	4.9	0.616657
			17.6	7	6.5491		8.4	7.6	4.4	0.550689
			17.6	8	6.24419		7.4	7	4.7	0.65303
			17.6	9	6.14576		9.3	6.4	3.9	0.505514
			17.6	10	6.056		6.7	6.5	5.1	0.772816
			17.6	11	5.88322		8.9	5.2	4.4	0.646779
			17.6	12	5.30293		8.6	5.1	3.4	0.513387
			17.6
		Lithic	17.6	1	7.89543	8.46667	11.9	8.8	4.7	0.459286
S06-67A	19.2956	-155.158	18.6	1	8.08585	7.97333	11	8.9	5.4	0.545761	0.516482
			18.6	2	7.8135		12.2	8.5	4.6	0.451719
			18.6	3	7.42175		10.3	8.1	4.9	0.536457
			18.6	4	7.41618		10.4	7.4	5.3	0.604148
			18.6	5	7.22139		10.4	7.1	5.1	0.593505
			18.6	6	6.97953		10	8.5	4	0.433861
			18.6	7	6.2313		9.4	7.8	3.3	0.385392
			18.6	8	5.55128		8.1	6.4	3.3	0.458333
			18.6	9	5.53983		6.6	5.6	4.6	0.756644
			18.6	10	5.51114		7.4	5.8	3.9	0.595298
			18.6	11	5.37242		7.1	5.6	3.9	0.618502
			18.6	12	4.69094		9.2	6.6	1.7	0.218164
S06-68B	19.3337	-155.209	11.8	1	11.2463	11.2133	15.7	15.1	6	0.389684	0.485103
			11.8	2	10.4913		16.2	13.2	5.4	0.369274
			11.8	3	10.1325		13.2	11.1	7.1	0.586557
			11.8	4	10.0609		13.6	11.7	6.4	0.507362
			11.8	5	9.80896		17.4	11.3	4.8	0.342316
			11.8	6	8.92591		11.9	8.3	7.2	0.724469
			11.8	7	8.27032		12.1	8.5	5.5	0.542326
			11.8	8	7.59177		9.2	8.2	5.8	0.66777
			11.8	9	7.17149		11.3	9.6	3.4	0.326441
			11.8	10	7.07155		11.5	7.5	4.1	0.441473
			11.8	11	7.02362		9.7	7.6	4.7	0.547401
			11.8	12	6.33276		10.4	7.4	3.3	0.376168
F06-4	19.3303	-155.275	9.5	1	22.3648	17.1333	27.9	24.3	16.5	0.633693	0.569045
			9.5	2	15.4328		20.4	19.8	9.1	0.452787
			9.5	3	15.2941		22.9	14.6	10.7	0.58518
			9.5	4	14.9525		23	15.3	9.5	0.506424
			9.5	5	13.5168		19.9	14.6	8.5	0.498673
			9.5	6	12.7823		19.5	11.9	9	0.590815
			9.5	7	11.8251		15.5	12.7	8.4	0.598703
			9.5	8	11.7495		14.4	12.8	8.8	0.648181
			9.5	9	11.6717		15.1	11.7	9	0.677113
			9.5	10	11.4497		15.8	12.5	7.6	0.540792
			9.5	11	11.1382		13.7	12.3	8.2	0.631686
			9.5	12	10.0039		16.2	10.3	6	0.464489
F06-5	19.3276	-155.275	9.8	1	19.6597	19.74	26.3	23.3	12.4	0.500917	0.540238
			9.8	2	19.4223		25.3	19.7	14.7	0.658452
			9.8	3	18.8314		26.5	17.5	14.4	0.668683
			9.8	4	18.7554		25.7	19.9	12.9	0.570422
			9.8	5	18.7394		22.6	21.1	13.8	0.631951
			9.8	6	18.5349		24.2	18.4	14.3	0.677672
			9.8	7	17.9394		28.7	21.4	9.4	0.379298
			9.8	8	17.4534		32.7	22.9	7.1	0.259458
			9.8	9	17.092		29.2	17.1	10	0.447518
			9.8	10	16.7432		24	15.9	12.3	0.629652
			9.8	11	16.2475		21	18.4	11.1	0.564683
			9.8	12	14.7191		21.8	15.9	9.2	0.494153
F06-7	19.3248	-155.278	10.1	1	23.6289	22.3067	33.9	28.2	13.8	0.446329	0.487109
			10.1	2	22.6156		34.5	25.4	13.2	0.44591
			10.1	3	20.8996		28.1	22.1	14.7	0.589886
			10.1	4	20.1371		26.5	21.7	14.2	0.592155
			10.1	5	18.9975		24.5	19.3	14.5	0.666816
			10.1	6	18.1044		26.1	23.2	9.8	0.398256
			10.1	7	17.4972		24	18.6	12	0.567962
			10.1	8	17.0939		27.7	18.4	9.8	0.434087
			10.1	9	16.6973		25.3	23	8	0.331639
			10.1	10	16.6789		28.1	19.2	8.6	0.37025
			10.1	11	16.2472		23.8	17	10.6	0.526979
			10.1	12	16.0969		26.6	16	9.8	0.475035
F06-8	19.3231	-155.27	10.3	1	18.8438	18.0867	24.6	20	13.6	0.613135	0.549076
			10.3	2	17.8369		22.6	18.6	13.5	0.65845
			10.3	3	17.2701		24.5	21.9	9.6	0.414444
			10.3	4	16.3563		22	19.5	10.2	0.492461
			10.3	5	16.2942		21.7	17.8	11.2	0.569873
			10.3	6	16.2248		21.8	15.8	12.4	0.668136
			10.3	7	16.0413		23.3	17.2	10.3	0.514511
			10.3	8	16.0264		19.3	17.2	12.4	0.680579
			10.3	9	15.8161		24	15.7	10.5	0.540921
			10.3	10	14.859		17.9	15.8	11.6	0.689768
			10.3	11	14.6003		23.5	17.2	7.7	0.382995
			10.3	12	12.3661		22.4	13.4	6.3	0.363634
			10.3
		Lithic	10.3	1	32.2252	33.5667	44.8	33.8	22.1	0.56793
F06-11	19.341	-155.226	10.1	1	21.1034	21.34	26.2	23.6	15.2	0.611275	0.484104
			10.1	2	20.6406		32	22.9	12	0.443291
			10.1	3	18.8614		27.5	20	12.2	0.52021
			10.1	4	18.3216		26.2	24.2	9.7	0.385224
			10.1	5	18.3016		36	25.8	6.6	0.216562
			10.1	6	17.1277		28.5	21.5	8.2	0.331262
			10.1	7	16.5177		21.6	16.3	12.8	0.682165
			10.1	8	16.0797		21.9	16.8	11.3	0.589117
			10.1	9	15.628		22.1	17.1	10.1	0.51955
			10.1	10	15.4141		21.5	16.7	10.2	0.538298
			10.1	11	15.3745		22.4	16.9	9.6	0.493405
			10.1	12	14.7034		19.3	18.3	9	0.478893
F4-44	19.3246	-155.296	10.3	1	14.8061	12.8533	19.8	16.9	9.7	0.530268	0.567099
			10.3	2	14.152		19.5	15.3	9.5	0.549997
			10.3	3	11.2227		13.1	13	8.3	0.63602
			10.3	4	11.1259		13.3	10.9	9.5	0.789014
			10.3	5	10.475		14.9	13.3	5.8	0.412011
			10.3	6	10.2454		14.7	11.8	6.2	0.470752
			10.3	7	10.0585		13	10.3	7.6	0.656785
			10.3	8	10.0129		14.8	11.9	5.7	0.429507
			10.3	9	9.80901		11.9	10.3	7.7	0.695502
			10.3	10	9.5363		13.5	8.8	7.3	0.669753
			10.3	11	8.99021		14.4	8.7	5.8	0.518188
			10.3	12	8.0347		12.4	8.9	4.7	0.447396
F06-13	19.3241	-155.296	10.3	1	17.4992	15.7467	22.9	19.5	12	0.567866	0.588952
			10.3	2	15.2393		21.5	17.7	9.3	0.476735
			10.3	3	14.7092		17.7	14.5	12.4	0.774018
			10.3	4	14.251		21.3	15.8	8.6	0.468792
			10.3	5	13.9717		17.2	15.7	10.1	0.614621
			10.3	6	13.6653		18.9	15.7	8.6	0.49925
			10.3	7	12.878		18.7	14.1	8.1	0.498832
			10.3	8	12.7917		18.7	12.3	9.1	0.600023
			10.3	9	11.6992		13.9	12	9.6	0.743316
			10.3	10	11.4469		14.4	12.4	8.4	0.628619
			10.3	11	11.1262		15.6	10.9	8.1	0.621169
			10.3	12	10.7119		15.1	11	7.4	0.574178
F06-14	19.3029	-155.306	12.9	1	14.8482	11.22	18.6	16	11	0.637641	0.656856
			12.9	2	12.2603		16.5	15.3	7.3	0.459447
			12.9	3	9.5304		12.7	9.6	7.1	0.643015
			12.9	4	9.29893		11.5	9.2	7.6	0.738875
			12.9	5	8.48074		10.2	9.2	6.5	0.670995
			12.9	6	6.60324		8	6.1	5.9	0.844583
			12.9	7	6.04713		7.8	6.3	4.5	0.641941
			12.9	8	5.94471		8.2	6.1	4.2	0.593851
			12.9	9	5.93542		8.2	5.1	5	0.773175
			12.9	10	5.47998		6.9	5.3	4.5	0.744132
			12.9	11	4.83259		6.6	5.7	3	0.489116
			12.9	12	4.0166		4.8	4.5	3	0.645497
F06-15	19.3296	-155.223	11.3	1	21.1596	18.5	31.4	26.7	11.3	0.390264	0.527787
			11.3	2	18.2434		26.8	17.7	12.8	0.5877
			11.3	3	17.6475		21.3	18.3	14.1	0.714174
			11.3	4	15.4229		22.1	16.6	10	0.522095
			11.3	5	15.318		20.8	18	9.6	0.496139
			11.3	6	14.8936		21.6	16.1	9.5	0.509429
			11.3	7	14.5764		23.8	16.9	7.7	0.383936
			11.3	8	14.4234		18.9	16.2	9.8	0.560064
			11.3	9	14.2794		21.8	15.9	8.4	0.451183
			11.3	10	13.7714		17.4	15.8	9.5	0.572955
			11.3	11	13.6631		23.3	12.3	8.9	0.525726
			11.3	12	13.6189		18.9	13.5	9.9	0.61978
F06-16	19.3276	-155.223	11.5	1	32.3606	27.3667	37	35.5	25.8	0.711877	0.513628
			11.5	2	30.7948		43.2	32.5	20.8	0.555111
			11.5	3	29.021		43.3	33.6	16.8	0.440449
			11.5	4	20.8736		28.6	26.5	12	0.435888
			11.5	5	17.8444		22.3	19.6	13	0.621817
			11.5	6	17.6951		23.8	19.4	12	0.55846
			11.5	7	15.899		21.3	17.8	10.6	0.544385
			11.5	8	15.364		18.8	19.1	10.1	0.532998
			11.5	9	14.4169		20.7	15.4	9.4	0.526481
			11.5	10	13.5987		24.8	13	7.8	0.434407
			11.5	11	12.1421		20.1	12.2	7.3	0.466171
			11.5	12	12.0126		20.9	14.3	5.8	0.335496
R1	19.368	-155.251	6.2	1	26.0449	24.2667	35	28.2	17.9	0.569763	0.556926
			6.2	2	25.906		29.4	26.4	22.4	0.80403
			6.2	3	22.1753		28.3	24.7	15.6	0.590042
			6.2	4	21.7244		30	26.7	12.8	0.452266
			6.2	5	21.2377		31	20.6	15	0.593577
			6.2	6	20.5215		24.8	24.2	14.4	0.587799
			6.2	7	20.1003		31.4	23.3	11.1	0.410374
			6.2	8	19.2974		29.2	21.4	11.5	0.460044
			6.2	9	18.603		21.2	20.8	14.6	0.69527
			6.2	10	18.5266		25.7	22.7	10.9	0.451281
			6.2	11	18.5163		28.5	22.5	9.9	0.39095
			6.2	12	15.4235		18.8	16.4	11.9	0.677713
S06-61A	19.2722	155.247	16.4	1	13.3041	8.5	19.3	14.7	8.3	0.492766	0.609722
			16.4	2	8.098		10.9	8.4	5.8	0.606143
			16.4	3	6.86715		9.2	8	4.4	0.512878
			16.4	4	6.27139		8.2	6.4	4.7	0.648785
			16.4	5	6.24579		8.1	6.4	4.7	0.652778
			16.4	6	6.07681		7.3	5.8	5.3	0.814518
			16.4	7	6.03315		7.5	6.1	4.8	0.709652
			16.4	8	5.99182		7.4	5.7	5.1	0.785266
			16.4	9	5.70405		8.3	5.2	4.3	0.654527
			16.4	10	5.31273		7.1	6.4	3.3	0.489547
			16.4	11	5.20355		7.4	5.6	3.4	0.528164
			16.4	12	4.26827		7.2	4.5	2.4	0.421637
S06-62A	19.272	-155.24	16.6	1	12.0891	11.8867	16.2	13.3	8.2	0.558638	0.557852
			16.6	2	12.0673		14.7	13.9	8.6	0.601634
			16.6	3	11.6935		16.2	10.5	9.4	0.720735
			16.6	4	10.9605		17.1	10	7.7	0.588834
			16.6	5	10.2762		15.7	9.6	7.2	0.586472
			16.6	6	8.51074		13.3	10.3	4.5	0.384475
			16.6	7	7.83634		10.3	7.3	6.4	0.738074
			16.6	8	7.40112		10.3	8.2	4.8	0.522295
			16.6	9	7.10619		8.9	8.4	4.8	0.555145
			16.6	10	7.06187		9.2	8.7	4.4	0.491812
			16.6	11	6.99417		9.9	7.2	4.8	0.568535
			16.6	12	5.9342		10.7	6.3	3.1	0.377572
S06-87A	19.3022	-155.249	13.1	1	8.43972	8.1	12.4	10.1	4.8	0.428913	0.578656
			13.1	2	7.76234		8.7	8.4	6.4	0.748653
			13.1	3	7.75117		9.9	9.6	4.9	0.502624
			13.1	4	7.57963		10.8	7.2	5.6	0.635053
			13.1	5	7.41084		9.2	7.9	5.6	0.656872
			13.1	6	7.34812		10.9	7	5.2	0.595307
			13.1	7	7.07031		9.4	8	4.7	0.541987
			13.1	8	7.07025		8.5	7.7	5.4	0.667481
			13.1	9	6.77819		8.3	6.7	5.6	0.750951
			13.1	10	6.53941		8.5	7	4.7	0.609312
			13.1	11	6.24431		9.3	7.7	3.4	0.401783
			13.1	12	6.21187		9.4	7.5	3.4	0.404934
			13.1
		Lithic	13.1	1	4.51887	5	6.8	5.9	2.3	0.363118
S06-89A	19.3031	-155.234	13.4	1	15.2073	9.91333	23.2	16.3	9.3	0.478239	0.562945
			13.4	2	8.631		11.4	9.4	6	0.579609
			13.4	3	8.27653		11.5	8.5	5.8	0.586637
			13.4	4	7.71183		9.1	9	5.6	0.618794
			13.4	5	7.45304		10	9	4.6	0.484883
			13.4	6	7.40548		9.5	7.5	5.7	0.675278
			13.4	7	6.60664		10.7	7.7	3.5	0.385594
			13.4	8	6.28705		7.8	5.9	5.4	0.796014
			13.4	9	6.25494		9.2	7	3.8	0.473523
			13.4	10	6.20118		9.2	5.4	4.8	0.681005
			13.4	11	6.1547		12.2	4.9	3.9	0.504413
			13.4	12	5.6209		8.6	5.9	3.5	0.491352
S06-86A	19.3034	-155.255	12.8	1	9.26613	9.08667	13.6	11.7	5	0.396376	0.556923
			12.8	2	8.77153		11.1	9.5	6.4	0.623242
			12.8	3	8.64628		13.5	8.4	5.7	0.535264
			12.8	4	8.44421		11.2	8.4	6.4	0.659829
			12.8	5	8.24905		10.7	8.6	6.1	0.6359
			12.8	6	8.18384		11.9	9.4	4.9	0.463296
			12.8	7	7.99508		10.8	9.1	5.2	0.524531
			12.8	8	7.90041		10.9	7.8	5.8	0.629024
			12.8	9	7.63932		9.6	8.6	5.4	0.594304
			12.8	10	7.31986		10.6	7.4	5	0.564548
			12.8	11	6.99613		9.6	8.7	4.1	0.44863
			12.8	12	6.96582		10.4	6.5	5	0.60813
F07-2	19.3444	-155.228	9.6	1	24.1372	22.5733	34	23.5	17.6	0.622643	0.573928
			9.6	2	22.1766		27.6	22.2	17.8	0.719099
			9.6	3	21.5878		27.7	22.7	16	0.638068
			9.6	4	21.4245		27.3	21.7	16.6	0.68202
			9.6	5	20.0774		29.6	21.7	12.6	0.497158
			9.6	6	19.6221		25.8	22.7	12.9	0.533049
			9.6	7	18.8001		25.5	20.2	12.9	0.568387
			9.6	8	18.6921		21.2	21.1	14.6	0.690309
			9.6	9	18.3409		24.6	20.9	12	0.529225
			9.6	10	17.5455		28.5	20.6	9.2	0.379692
			9.6	11	16.9261		22.1	15.9	13.8	0.736181
			9.6	12	13.8812		23.2	18.9	6.1	0.29131
		Lithic	9.6	1	15.5246	15.8667	19.5	16.4	11.7	0.654254
F07-3	19.3396	-155.277	8.5	1	23.6317	23.4067	34.4	27.8	13.8	0.446249	0.626392
			8.5	2	22.7822		36.8	27.7	11.6	0.363324
			8.5	3	22.246		27	23.3	17.5	0.697715
			8.5	4	22.2168		31.8	23.3	14.8	0.543714
			8.5	5	19.8924		26.2	20.3	14.8	0.641746
			8.5	6	19.7128		22.2	21.3	16.2	0.744987
			8.5	7	18.9799		22.8	20.4	14.7	0.681608
			8.5	8	17.7828		20.4	17.9	15.4	0.805896
			8.5	9	17.7205		26	17.4	12.3	0.578288
			8.5	10	17.1846		21.4	16.7	14.2	0.751144
			8.5	11	16.437		20.9	16.6	12.8	0.687199
			8.5	12	15.7664		20.2	17.8	10.9	0.574832
F07-6	19.3528	-155.258	7.4	1	38.5999	35.5	46.4	39.6	31.3	0.730193	0.585955
			7.4	2	35.164		38.6	37.8	29.8	0.780147
			7.4	3	33.9458		58.2	28.6	23.5	0.576001
			7.4	4	32.3274		42.2	35.9	22.3	0.57293
			7.4	5	28.8582		49.4	35	13.9	0.334285
			7.4	6	28.2154		37.4	30.8	19.5	0.574544
			7.4	7	24.4193		31.6	24	19.2	0.697191
			7.4	8	24.3603		38.5	25.2	14.9	0.478361
			7.4	9	24.2427		34	28.9	14.5	0.462572
			7.4	10	23.2831		29.3	23.8	18.1	0.685419
			7.4	11	21.1		25.3	23.5	15.8	0.647982
			7.4	12	20.8641		28.4	24.6	13	0.491832
		Outsize scoria			56.2268		74.5	54.6	43.7	0.685184
		Lithic	7.4	1	63.5284	64.4	73.7	69.3	50.2	0.70243
F07-7	19.3395	-155.248	9.1	1	26.5764	25.62	34.8	29	18.6	0.585497	0.559953
			9.1	2	25.1886		35.5	24.6	18.3	0.619255
			9.1	3	24.6716		32.5	28.7	16.1	0.527161
			9.1	4	22.9883		33.6	26.2	13.8	0.465113
			9.1	5	22.8519		32.7	25.7	14.2	0.489833
			9.1	6	21.9656		26.1	25.7	15.8	0.610057
			9.1	7	20.2653		24.5	21.5	15.8	0.688422
			9.1	8	19.2707		25.8	20.1	13.8	0.605998
			9.1	9	17.9931		22.2	20.5	12.8	0.600007
			9.1	10	17.9824		26.3	20.1	11	0.478428
			9.1	11	17.8525		22.5	21.8	11.6	0.523767
			9.1	12	17.3439		24.3	19	11.3	0.525894
S07-19	19.3288	-155.251	10.2	1	18.8304	17.8733	25.2	20.7	12.8	0.560434	0.53512
			10.2	2	18.1586		24	19.8	12.6	0.578006
			10.2	3	17.0716		25.1	18.7	10.6	0.48927
			10.2	4	16.0599		21.9	19.3	9.8	0.476678
			10.2	5	15.2229		21.2	16	10.4	0.564684
			10.2	6	15.209		19.1	16.3	11.3	0.640425
			10.2	7	15.1331		20.3	19.4	8.8	0.443439
			10.2	8	15.0359		19.8	14.8	11.6	0.677633
			10.2	9	14.7635		20.2	17.7	9	0.475971
			10.2	10	13.9445		18.7	14.5	10	0.607289
			10.2	11	13.8337		24.1	16.9	6.5	0.322078
			10.2	12	13.7162		21	12.8	9.6	0.58554
S07-23	19.3175	-155.28	11	1	20.4162	17.4933	34.4	18.6	13.3	0.525794	0.582334
			11	2	19.7741		27.8	21.9	12.7	0.514706
			11	3	16.3999		19.5	15.6	14.5	0.831359
			11	4	13.5703		19.6	15	8.5	0.49573
			11	5	13.3919		17.4	12.9	10.7	0.714191
			11	6	11.6016		16.9	12	7.7	0.5407
			11	7	10.3308		13.6	12.1	6.7	0.522291
			11	8	10.3065		16.2	10.9	6.2	0.466574
			11	9	10.0682		13.5	10.5	7.2	0.604743
			11	10	9.56524		13.6	9.9	6.5	0.560178
			11	11	9.53113		13.3	9.3	7	0.629406
F07-10	19.3167	-155.279	11.1	1	18.2337	15.1133	26	20.1	11.6	0.507427	0.590367
			11.1	2	16.9768		23.2	18.5	11.4	0.550269
			11.1	3	12.9465		21.7	12.5	8	0.485741
			11.1	4	12.4186		17	13.1	8.6	0.576286
			11.1	5	11.4352		14.4	11.8	8.8	0.675088
			11.1	6	10.4394		14.3	10.2	7.8	0.645842
			11.1	7	10.2054		14	10.4	7.3	0.604982
			11.1	8	9.21895		12.3	9.1	7	0.661645
			11.1	9	9.19855		13.8	9.4	6	0.526802
			11.1	10	9.19231		17.4	7.2	6.2	0.553925
			11.1	11	8.36173		12.6	8	5.8	0.577694
			11.1	12	7.85192		11.3	6.8	6.3	0.718699
S07-25	19.3224	-155.28	10.4	1	15.7493	13.3533	20.1	16.9	11.5	0.62396	0.606189
			10.4	2	13.1156		18.7	12.7	9.5	0.616454
			10.4	3	12.8415		17.6	12.8	9.4	0.626277
			10.4	4	11.637		17	10.3	9	0.680142
			10.4	5	11.5385		13	11.7	10.1	0.818949
			10.4	6	10.7507		12.9	11.2	8.6	0.715475
			10.4	7	10.7397		14	11.2	7.9	0.630891
			10.4	8	10.1594		19.1	9	6.1	0.465256
			10.4	9	10.0184		13.4	11.2	6.7	0.546907
			10.4	10	9.14115		15.5	11.2	4.4	0.333947
			10.4	11	8.92651		10.8	8.9	7.4	0.754788
			10.4	12	8.87847		13.9	9.5	5.3	0.461218
F9-12	19.3609	-155.255	6.6	1	30.7158	24.7533	39.3	32.2	22.9	0.643741	0.601804
			6.6	2	24.9255		28.9	27.2	19.7	0.70264
			6.6	3	23.4728		36.4	20.9	17	0.616347
			6.6	4	21.436		28.7	22	15.6	0.620829
			6.6	5	19.339		26.2	21.4	12.9	0.544794
			6.6	6	18.8375		29.2	19.4	11.8	0.495781
			6.6	7	18.3722		26.1	18	13.2	0.609
			6.6	8	16.8394		22.3	16.1	13.3	0.701918
			6.6	9	16.7316		22.7	18.1	11.4	0.562409
			6.6	10	16.5305		24.5	17.9	10.3	0.491844
			6.6	11	16.1019		20.1	15.5	13.4	0.759173
			6.6	12	15.3158		23.7	16.3	9.3	0.473168
			6.6
		Lithic	6.6	1	30.0995	32.3333	46.5	32.4	18.1	0.466315
S07-26	19.3442	-155.273	8	1	25.337	23.4667	36.7	27.7	16	0.501819	0.607471
			8	2	23.8319		27.8	26.9	18.1	0.661881
			8	3	22.4025		27.3	23.4	17.6	0.696343
			8	4	21.3105		29	20.6	16.2	0.6628
			8	5	21.2914		24.2	23.6	16.9	0.707169
			8	6	19.501		24	20.6	15	0.674609
			8	7	19.2671		31	20.6	11.2	0.443204
			8	8	19.1499		23.3	22	13.7	0.605106
			8	9	18.6555		24.8	18.7	14	0.650102
			8	10	17.864		25.4	18.1	12.4	0.578316
			8	11	16.8385		23.6	17	11.9	0.59411
			8	12	16.8269		25.5	17.3	10.8	0.514198
			8
		Lithic	8	1	21.6781	24.1	36.9	23.8	11.6	0.391432
		Reticulite		1	24.6369		38.9	29.8	12.9	0.378884
				2	18.939		36	18.5	10.2	0.395242
				3	24.8726		38.3	27.9	14.4	0.440515
				4	22.8378		41.8	27.4	10.4	0.307305
				5	17.3683		24.5	23.5	9.1	0.379249
F10-1	19.3012	-155.227	13.9	1	22.5676	19.82	32.3	25.6	13.9	0.483385	0.514383
			13.9	2	18.8261		25.6	18.1	14.4	0.668965
			13.9	3	17.8189		24.6	21.1	10.9	0.478429
			13.9	4	17.7774		26.5	19.1	11.1	0.493382
			13.9	5	17.3608		25	16.1	13	0.647978
			13.9	6	17.1774		22.4	18.7	12.1	0.591208
			13.9	7	16.1807		29	17.6	8.3	0.367386
			13.9	8	15.7478		25.7	13.1	11.6	0.632202
			13.9	9	15.6071		24	19.8	8	0.366988
			13.9	10	15.4377		19	18.8	10.3	0.544981
			13.9	11	15.1747		23.7	15.2	9.7	0.511065
			13.9	12	13.755		23	15.5	7.3	0.386628
F10-12	19.3085	-155.303	12.3	1	16.0704	10.5467	19.3	16.8	12.8	0.710848	0.652256
			12.3	2	9.09625		12.8	9.8	6	0.535714
			12.3	3	8.83683		13.6	8.6	5.9	0.545548
			12.3	4	8.55626		11.6	9	6	0.58722
			12.3	5	8.19128		12.2	8.5	5.3	0.520459
			12.3	6	7.93112		11.7	8.2	5.2	0.530889
			12.3	7	7.8612		10.1	7.4	6.5	0.75186
			12.3	8	7.52648		9.5	6.8	6.6	0.82116
			12.3	9	7.49217		11.5	6.9	5.3	0.59498
			12.3	10	7.41728		8.6	7.3	6.5	0.820357
			12.3	11	6.86981		7.9	7.2	5.7	0.755779
F10-13	19.317	-155.297	11.2	1	22.5558	19.2133	29.1	23.9	16.5	0.62566	0.608789
			11.2	2	22.0398		27.2	24.6	16	0.61854
			11.2	3	16.8418		21	18.8	12.1	0.608971
			11.2	4	15.8267		19.5	19	10.7	0.555891
			11.2	5	15.2087		21.5	20.2	8.1	0.388678
			11.2	6	13.3071		17.2	13.7	10	0.651442
			11.2	7	13.0714		16.1	13.6	10.2	0.689315
			11.2	8	12.6498		18.8	11.1	9.7	0.671477
			11.2	9	11.3029		15.2	10	9.5	0.770552
			11.2	10	10.9233		14.6	11.3	7.9	0.615051
			11.2	11	9.29284		12.5	10.7	6	0.518805
			11.2	12	7.95103		10.2	8.8	5.6	0.59108
			11.2
		Lithic	11.2	1	11.4403	12	16.1	12.4	7.5	0.530808
			11.2	2	13.0883	13.5333	17.8	13.4	9.4	0.608647
						12.7667
F10-6	19.313	-155.306	11.7	1	17.6791	15.54	28.8	18.1	10.6	0.46427	0.635464
			11.7	2	16.8595		24.5	16.3	12	0.600488
			11.7	3	13.7396		18.7	14.6	9.5	0.574945
			11.7	4	13.32		15	13.7	11.5	0.802217
			11.7	5	12.6481		17.5	14.1	8.2	0.522018
			11.7	6	12.5212		16.4	13.3	9	0.609389
			11.7	7	12.2716		16.8	11	10	0.735612
			11.7	8	12.1579		13.5	12.8	10.4	0.791155
			11.7	9	12.0931		16.8	12.1	8.7	0.6102
			11.7	10	12.0663		15	12.2	9.6	0.709652
			11.7	11	11.5081		16.2	11.2	8.4	0.62361
			11.7	12	10.4721		13.8	11.4	7.3	0.582011
F10-26-2	19.3092	-155.257	12.1	1	30.5751	23.26	39.8	38.2	18.8	0.482153	0.569772
			12.1	2	23.4095		33.2	23	16.8	0.607962
			12.1	3	19.5643		26.6	20.4	13.8	0.592411
			12.1	4	18.9813		24	20.5	13.9	0.62666
			12.1	5	18.9321		26.8	21.1	12	0.504629
			12.1	6	17.9019		29.9	16.4	11.7	0.528358
			12.1	7	17.6259		23	18.6	12.8	0.618856
			12.1	8	17.1297		24	17.9	11.7	0.564487
			12.1	9	16.8062		25.1	19.7	9.6	0.431719
			12.1	10	16.4849		25.5	14.4	12.2	0.636661
			12.1	11	16.2941		21.2	17.9	11.4	0.585208
			12.1	12	15.5953		19.6	16.4	11.8	0.658161
			12.1	13	15.3723		21.7	18	9.3	0.470562
			12.1	14	14.5713		18.3	15.8	10.7	0.629259
			12.1	15	13.7054		17.9	14.1	10.2	0.642043
			12.1	16	12.4003		20.3	10.1	9.3	0.649493
F10-27	19.302	-155.258	12.9	1	28.8857	22.9933	40.6	30.6	19.4	0.550399	0.515782
			12.9	2	25.4381		36.6	25.7	17.5	0.570599
			12.9	3	22.5547		27.9	23.5	17.5	0.683443
			12.9	4	16.8738		24.6	21.7	9	0.389534
			12.9	5	16.4652		20.2	17.4	12.7	0.677413
			12.9	6	15.9771		20.8	17.2	11.4	0.602711
			12.9	7	15.8131		23.7	19.4	8.6	0.401073
			12.9	8	15.8081		28.5	16.7	8.3	0.38045
			12.9	9	15.3612		21.6	17.3	9.7	0.50179
			12.9	10	15.3285		21.4	17	9.9	0.519044
			12.9	11	14.9823		24.4	17.9	7.7	0.368442
			12.9	12	14.5472		21.3	14.9	9.7	0.544489
			12.9	13	14.1879		20	17	8.4	0.455554
			12.9	14	13.0553		18.5	12.4	9.7	0.640435
			12.9	15	11.3483		16.6	12.4	7.1	0.494873
			12.9	16	11.0805		18.2	11.5	6.5	0.449292
			12.9
		Lithics	12.9		33.4484	34	42	33	27	0.725241
			12.9		11.3102	12.7333	20.1	12.2	5.9	0.376768
			12.9		14.3804	14.5333	17	14.7	11.9	0.752773
						20.4222
F10-28	19.2946	-155.26	13.6	1	17.764	14.8667	24.5	17.6	13	0.626043	0.555799
			13.6	2	14.1089		19.3	13.6	10.7	0.660443
			13.6	3	13.09		21.6	11.8	8.8	0.551207
			13.6	4	13.0067		18.6	13	9.1	0.585212
			13.6	5	12.9327		17.9	15.9	7.6	0.450493
			13.6	6	11.4767		17	11.7	7.6	0.538885
			13.6	7	11.452		17.2	11.8	7.4	0.519429
			13.6	8	11.0305		13	11.6	8.9	0.724752
			13.6	9	11.0061		17.8	10.7	7	0.50722
			13.6	10	9.93213		14.4	12.6	5.4	0.400892
F10-9	19.3233	-155.269	10.4	1	20.8755	18.3	28.5	22.8	14	0.54921	0.517451
			10.4	2	16.7709		22.1	18.4	11.6	0.575245
			10.4	3	16.5106		23.2	20	9.7	0.450311
			10.4	4	16.4828		25.3	17.7	10	0.472556
			10.4	5	16.2269		23.3	17.3	10.6	0.527965
			10.4	6	15.4631		23.9	18.2	8.5	0.407553
			10.4	7	14.411		24.6	15.4	7.9	0.405881
			10.4	8	13.7838		19.9	14	9.4	0.563167
			10.4	9	13.3347		19.7	11.8	10.2	0.669
			10.4	10	13.328		19.3	14.1	8.7	0.527389
			10.4	11	13.108		20.1	13.5	8.3	0.503864
			10.4	12	12.5518		16.5	14.1	8.5	0.557272
F10-29	19.3181	-155.28	10.9	1	25.4108	21.8133	34.6	26.2	18.1	0.60116	0.686631
			10.9	2	23.347		31.7	21.7	18.5	0.705362
			10.9	3	20.1009		24.9	19.3	16.9	0.770918
			10.9	4	19.3559		29.1	17.8	14	0.615137
			10.9	5	17.8965		22.3	16.8	15.3	0.790468
			10.9	6	17.7741		21.6	19.4	13.4	0.654602
			10.9	7	17.129		22.4	15.8	14.2	0.754807
			10.9	8	15.7417		23	16	10.6	0.552563
			10.9	9	15.7041		24.9	15.4	10.1	0.515776
			10.9	10	15.0898		19	13.7	13.2	0.818157
			10.9	11	14.3666		17.6	16.2	10.4	0.615913
			10.9	12	14.3243		17.8	12.9	12.8	0.844705
F10-3	19.2968	-155.214	15	1	15.5362	14.5667	20	15	12.5	0.721688	0.760724
			15	2	14.5971		16.5	14.5	13	0.840461
			15	3	14.1155		15	15	12.5	0.833333
			15	4	13.5267		22.5	11	10	0.635642
			15	5	13.4815		16.5	13.5	11	0.737028
			15	6	12.6827		16	15	8.5	0.548673
			15	7	12.6515		13.5	12.5	12	0.92376
			15	8	12.4997		15.5	12	10.5	0.769897
			15	9	12.3639		14	13.5	10	0.727393
			15	10	12.3311		12.5	12.5	12	0.96
			15	11	12.2898		16.5	12.5	9	0.62668
			15	12	12.1424		15.5	11	10.5	0.804132
F10-5	19.325	-155.236	11.2	1	24.7154	22.2	30.5	22.5	22	0.839811	0.629543
			11.2	2	22.4296		28	26	15.5	0.574468
			11.2	3	20.9386		34	20	13.5	0.517701
			11.2	4	19.5502		27	20.5	13.5	0.573819
			11.2	5	19.0729		29	16.5	14.5	0.662868
			11.2	6	18.2581		23.5	18.5	14	0.671442
			11.2	7	17.7133		23.5	21.5	11	0.489372
			11.2	8	17.4523		22.5	17.5	13.5	0.680336
			11.2	9	17.3801		25	17.5	12	0.57371
			11.2	10	15.8647		22	16.5	11	0.57735
			11.2	11	15.3368		18.5	15	13	0.78039
			11.2	12	15.2395		19.5	16.5	11	0.613244
F07-7 (2010)	19.3399	-155.248	9.1	1	35.0367	24.7	46	34	27.5	0.695367	0.676198
			9.1	2	22.3066		29.5	21.5	17.5	0.694877
			9.1	3	21.2918		26	22.5	16.5	0.682191
			9.1	4	21.0011		28.5	26	12.5	0.459199
			9.1	5	20.6037		24.5	21	17	0.749473
			9.1	6	20.3037		24	22.5	15.5	0.667014
			9.1	7	20.2307		23	22.5	16	0.703339
			9.1	8	19.6657		26.5	20.5	14	0.600659
			9.1	9	19.1985		25.5	18.5	15	0.690614
			9.1	10	18.8483		24	18	15.5	0.745744
			9.1	11	18.5135		24.5	18.5	14	0.657596
			9.1	12	18.4775		22	18.5	15.5	0.768306
F10-10	19.309	-155.278	11.9	1	16.5998	16.5667	18.5	21.5	11.5	0.576624	0.552233
			11.9	2	16.3988		24	17.5	10.5	0.512348
			11.9	3	15.9786		21.5	16.5	11.5	0.610572
			11.9	4	15.5268		21	15.5	11.5	0.637415
			11.9	5	15.5029		18	18	11.5	0.638889
			11.9	6	14.5314		19	17	9.5	0.528594
			11.9	7	14.0589		19.5	19	7.5	0.389643
			11.9	8	13.8639		16.5	17	9.5	0.567227
			11.9	9	13.8557		19	17.5	8	0.438727
			11.9	10	13.7507		25	13	8	0.44376
			11.9	11	13.4442		18	13.5	10	0.6415
			11.9	12	13.4442		18	13.5	10	0.6415
F04-19-1	19.4165	-155.245	3.7	1	16.5827	14.5333	19	16	15	0.860309	0.789567
			3.7	2	14.7973		16	15	13.5	0.871421
			3.7	3	14.4712		19	14.5	11	0.662723
			3.7	4	13.6059		15.5	13	12.5	0.880587
			3.7	5	12.1785		17	12.5	8.5	0.583095
			3.7	6	12.1112		17	11	9.5	0.694709
			3.7	7	12.0527		14.5	11.5	10.5	0.813123
			3.7	8	11.6163		15	11	9.5	0.739574
			3.7	9	11.261		16	10.5	8.5	0.655789
			3.7	10	11.1199		12.5	11	10	0.852803
			3.7	11	10.9924		11.5	11	10.5	0.933564
			3.7	12	9.99166		10.5	10	9.5	0.927105
F04-19-3	19.4165	-155.245	3.7	1	25.1151	22.6667	35.5	25.5	17.5	0.581639	0.670636
			3.7	2	23.9548		39.5	24	14.5	0.470938
			3.7	3	19.6937		33.5	19	12	0.475644
			3.7	4	19.5961		25	21.5	14	0.603864
			3.7	5	19.1524		24.5	18.5	15.5	0.728053
			3.7	6	17.6193		19.5	17	16.5	0.906238
			3.7	7	16.9282		21	21	11	0.52381
			3.7	8	16.2626		22	17	11.5	0.594651
			3.7	9	15.9399		18	15	15	0.912871
			3.7	10	15.4466		19.5	14	13.5	0.817057
			3.7	11	14.8519		18	14	13	0.818923
			3.7	12	14.5358		19.5	15	10.5	0.613941
F6-7	19.3668	-155.267	5.7	1	21.2613	19.4467	24.2	23.5	16.9	0.708672	0.683127
			5.7	2	19.9699		25.2	18.7	16.9	0.778513
			5.7	3	18.6368		23.9	22.2	12.2	0.529644
			5.7	4	17.8029		23.7	19.2	12.4	0.581295
			5.7	5	17.4817		19.9	17.1	15.7	0.851089
			5.7	6	16.9616		19.3	17.2	14.7	0.806816
			5.7	7	16.6647		20.8	17.8	12.5	0.649633
			5.7	8	16.6439		22.2	16.1	12.9	0.682339
			5.7	9	15.6847		23.2	16.8	9.9	0.50146
			5.7	10	15.3475		20.3	15.9	11.2	0.623407
			5.7	11	15.2535		18.2	15.6	12.5	0.741843
			5.7	12	14.7526		18.3	14.5	12.1	0.742807
			5.7
		Lithics	5.7	1	27.4789	28.1	32.2	31.9	20.2	0.630272
			5.7	2	21.6121	22.0333	26.6	23	16.5	0.667082
						25.0667
F10-115-5	19.4165	-155.245	3.7	1	25.3267	22.6533	29	26.3	21.3	0.771263	0.595736
			3.7	2	21.9987		28.9	22.6	16.3	0.6378
			3.7	3	21.8848		24.3	23.7	18.2	0.758393
			3.7	4	21.6109		29.2	22.3	15.5	0.607418
			3.7	5	20.192		25.4	22.2	14.6	0.614836
			3.7	6	19.3545		30.7	19.2	12.3	0.506623
			3.7	7	18.1467		22.7	19.5	13.5	0.641658
			3.7	8	17.7408		23.4	19.4	12.3	0.577293
			3.7	9	16.4063		23	16	12	0.625543
			3.7	10	16.1134		29.3	13.1	10.9	0.556361
			3.7	11	15.5276		23.2	16.3	9.9	0.509093
			3.7	12	15.5239		27.5	17.9	7.6	0.342547
			3.7
			3.7	13	14.0475		18	14	11	0.692935
			3.7	14	15.5279		18	16	13	0.766032
			3.7	15	11.7879		14	13	9	0.667124
			3.7	16	13.6082		15	14	12	0.828079
			3.7	17	13.7823		17	14	11	0.713024
			3.7	18	12.818		18	13	9	0.588348
			3.7	19	12.6034		14	13	11	0.815374
			3.7	20	12.9266		16	15	9	0.580948
			3.7	21	13.0843		16	14	10	0.668153
			3.7	22	14.6357		19	15	11	0.651584
			3.7
		Lithics	3.7	1	24.8209	25.9	35	25.7	17	0.566824
			3.7	2	18.587	19.9333	28.7	19.8	11.3	0.474029
			3.7	3	18.8799	20.6333	26.6	25.3	10	0.385477
			3.7	4	18.4908	18.9333	22.9	20.3	13.6	0.630773
			3.7			21.35
			3.7	5	46.8476	48.6667	63	51	32	0.56454
			3.7	6	39.8114	41.6667	57	41	27	0.558514
			3.7	7	39.9008	41	55	35	33	0.75214
			3.7	8	38.6196	39	45	40	32	0.754247
			3.7	9	24.4365	25	32	24	19	0.685603
						39.0667
S13-378	19.3473	-155.278	7.7	1	26.893	26.4133	51.8	29.8	12.6	0.320699	0.540909
			7.7	2	25.1918		32.4	25.7	19.2	0.665368
			7.7	3	24.1587		34.3	23.9	17.2	0.600734
			7.7	4	23.0236		33.8	23.6	15.3	0.541723
			7.7	5	22.7126		34.9	30.8	10.9	0.332459
			7.7	6	22.7074		29.9	22.9	17.1	0.653496
			7.7	7	22.3543		36	21.4	14.5	0.522408
			7.7	8	21.7104		31.4	21.3	15.3	0.591612
			7.7	9	21.6358		34.5	17.9	16.4	0.659945
			7.7	10	21.5713		28.1	24.3	14.7	0.56255
			7.7	11	20.6809		28.3	23.5	13.3	0.515732
			7.7	12	19.9965		30.6	20.1	13	0.524185
Notes:
Lat and Long in Old Hawaiian Datum
Distance is distance in kilometers from assumed vent in center of caldera
Nom. Diam is nominal diameter in millimeters of a sphere with diameters given in columns H-J
ML, Average diameter in millimeters of the 5 largest scoria clasts, or of all lithic clasts (only the largest 5 if more than 5 lithic clasts)
FCR, Corey shape factor
Av FCR, average of individual vaues at a site
Yellow highlight indicates liithic clasts; no highlight, scoria clasts

## Sheet: K-3 thickness
Site	Lat	Long	Thickness (cm)
F02-1	19.3328	-155.261	6
F02-3	19.3727	-155.241	20
F6-1	19.3682	-155.263	12
S4-27	19.3392	-155.281	7
K-15	19.3547	-155.24	19
F01-55	19.3198	-155.255	7
F02-4	19.29	-155.226	3
F02-5	19.3013	-155.227	2
F02-6	19.323	-155.256	3
F02-7	19.3218	-155.256	4
F02-8	19.3259	-155.253	3
F02-13	19.3193	-155.223	5
F02-18	19.3205	-155.223	5
F02-19	19.3352	-155.225	8
F01-43	19.3334	-155.269	7
F7-8	19.3226	-155.296	5
F01-57	19.3664	-155.262	10
F01-59	19.318	-155.27	4
F01-61	19.3232	-155.247	5
F01-62	19.3268	-155.228	4
F01-10	19.3228	-155.281	3
F01-14	19.3175	-155.281	4
F01-28	19.3428	-155.276	6
F01-29	19.3543	155.255	7
F01-39	19.3234	-155.265	7
F0-6 (R1)	19.3681	-155.251	9
S0-7	19.3275	-155.255	2
S0-9	19.347	-155.265	6
F0-8	19.3433	-155.269	9
F0-10	19.3392	-155.268	12
F0-11	19.3408	-155.227	12
F0-17	19.3305	-155.305	8
F0-18	19.3281	-155.299	10
F9-1	19.3164	-155.297	8
F9-3	19.316	-155.3	4
S9-49	19.3468	-155.233	6
F7-1	19.3489	155.265	10
F7-3	19.3477	-155.266	8
F7-4	19.343	-155.272	9
F7-5	19.3359	-155.275	8
F7-6	19.3324	-155.261	6
F7-7	19.345	-155.279	9
F7-9	19.3373	-155.225	5
F7-23	19.3532	-155.259	7
F7-33 (KSF	19.3443	-155.273	8
DP6-4	19.371	-155.259	12
F6-3	19.3724	-155.259	6
R8	19.3697	-155.247	14
F4-36	19.3403	-155.277	4
F4-46	19.3508	-155.262	7
F4-65	19.3595	-155.235	12
F4-68	19.3657	-155.265	13
F02-25	19.3595	-155.235	18
F05-14	19.3489	-155.266	8
S06-4	19.349	-155.277	5.5
F05-19	19.3637	-155.256	15
S04-118	19.3521	-155.211	7
F05-1	19.3481	-155.279	3
F05-3	19.3437	-155.228	2
F05-9	19.3314	-155.302	7
F05-11	19.3151	-155.307	1-3
F05-16	19.3325	-155.274	14
F05-19	19.3637	-155.256	15
S05-31	19.3227	-155.271	6
S05-32	19.3239	-155.267	4
S05-33	19.3234	-155.262	8
S05-34	19.3235	-155.257	6
S05-35	19.3258	-155.254	7
S05-36	19.3244	-155.251	8
S05-37	19.3204	-155.254	9
F05-20	19.3073	-155.26	5
F05-22	19.3097	-155.251	4
S05-60	19.3215	-155.222	0.3
S05-61	19.3186	-155.225	2-3
S05-235	19.3655	-155.259	5
S05-252	19.3375	-155.281	10
F04-1	19.3437	-155.275	4
F04-3	19.343	-155.276	11
F04-4	19.343	-155.272	8
F04-10	19.3281	-155.299	12
F04-14	19.3395	-155.277	4
F04-12	19.3485	-155.266	11
F04-13	19.3485	-155.266	9-10
F04-15	19.3529	-155.253	10
F04-24	19.3744	-155.227	6-9
F03-4	19.3339	-155.278	4
F03-6	19.3175	-155.281	8
F03-8	19.327	-155.224	2-3
F03-9	19.3266	-155.226	2.5
S05-186	19.3275	-155.222	3
S06-5	19.3474	-155.258	8
S06-15	19.3102	-155.218	2.5-3
S06-16	19.3058	-155.223	1.5
S06-17	19.3001	-155.228	2
S06-18	19.2912	-155.228	2
S06-19	19.2896	-155.235	1.5
S06-20	19.2888	-155.237	1
S06-21	19.2867	-155.243	2
S06-22	19.2877	-155.249	1.5
S06-23	19.2861	-155.254	0.5-1
S06-24	19.2831	-155.26	0.5
S06-25	19.3094	-155.308	2
S06-26	19.3145	-155.312	2
S06-27	19.312	-155.313	1-4
S06-31	19.2781	-155.271	0.2-0.5
S06-33	19.2773	-155.281	0.2
S06-34	19.2841	-155.28	0.5-1
S06-35	19.2901	-155.277	0.5-1
S06-41	19.3103	-155.209	2
S06-42	19.3034	-155.211	4
S06-43	19.2965	-155.214	5
S06-44	19.2901	-155.212	2
S06-46	19.2769	-155.208	2
S06-48	19.2761	-155.215	2
S06-59	19.2787	-155.25	1.5
S06-60A	19.2722	-155.252	2
S06-61A	19.2722	-155.247	2
S06-62A	19.272	-155.24	2
S06-63A	19.2716	-155.232	2
S06-65A	19.2687	-155.218	2
S06-66A	19.2981	-155.156	1
S06-67A	19.2956	-155.158	1.5
S06-68A	19.3337	-155.209	3
F06-3	19.3711	-155.259	18
S06-71	19.3348	-155.275	8
F06-4	19.3303	-155.275	8
F06-5	19.3276	-155.275	5
F06-7	19.3248	-155.278	3
F06-8	19.3231	-155.27	4
F06-12	19.3371	-155.227	9
F06-13	19.3241	-155.296	6
F06-15	19.3296	-155.223	7
F06-16	19.3276	-155.223	4
F06-17	19.3633	-155.256	8
F06-11	19.341	-155.226	6
F07-2	19.3444	-155.228	7
F07-3	19.3396	-155.277	11
F07-6	19.3528	-155.258	7
F07-7	19.3395	-155.248	12
S07-23	19.3175	-155.28	2-3
F07-10	19.3167	-155.279	2
S07-25	19.3224	-155.28	3
S07-19	19.3288	-155.251	4
F9-12	19.3609	-155.255	7
F10-1	19.3012	-155.227	3
F10-2	19.2965	-155.214	6
F10-3	19.2968	-155.214	2
F10-5	19.325	-155.236	6
F10-6	19.313	-155.306	6
F10-9	19.3233	-155.269	6
F10-12	19.3085	-155.303	1
F10-13	19.317	-155.297	2
F10-26	19.3092	-155.257	3
F10-27	19.302	-155.258	5
F10-28	19.2946	-155.26	1
F10-29	19.3181	-155.28	5
F10-115-5	19.4165	-155.245	10
F6-7 (2010	19.3668	-155.267	8
F4-69	19.3668	-155.267	14
S11-1	19.2955	-155.155	2.5
S13-378	19.3473	-155.278	11
S9-17	19.4367	-155.283	6 (9)
S9-18	19.4444	-155.311	1

## Sheet: K-3 locations median grain size
Locations are Old Hawaiian Datum
Site	Lat	Long	Median grain size, mm
S05-28K-3	19.3245	-155.236	1.68
S05-32A	19.3239	-155.267	1.5
S05-34A	19.3235	-155.257	1.85
S05-186A	19.3275	-155.222	1.8
F4-36-K3	19.3395	-155.277	2.99
F04-4-K3	19.343	-155.272	2.34
WR1-1	19.3591	-155.262	3.74
S05-235A	19.3655	-155.259	3.64
S9-39K3	19.3684	-155.262	3.11
F01-46K3	19.3664	-155.262	3
S05-268A	19.3469	-155.233	3.02
F05-2A	19.3352	-155.225	1.87
S05-252K3combined	19.3375	-155.281	2.63
R13-K3	19.3725	-155.24	4.28
S9-41combined	19.3735	-155.253	4.97
K15sieve	19.3547	-155.24	3.79
F05-14A	19.3489	-155.266	3.96
F05-1(K3)	19.3481	-155.279	2.95
S06-4	19.349	-155.277	2.98
S06-5A	19.3474	-155.258	3.33
F05-13(2)	19.3542	-155.257	2.9
F05-19(K-3)	19.3637	-155.256	3.43
S04-118A	19.3521	-155.211	2.96
S06-15A	19.3102	-155.218	2.27
S06-18A	19.2912	-155.228	1.06
S06-16A	19.3058	-155.223	1.19
S06-17A	19.3001	-155.228	1.19
S06-20A	19.2888	-155.237	0.87
S06-21A	19.2867	-155.243	2.17
S06-23A	19.2861	-155.254	0.84
S06-22B-recal	19.2877	-155.249	1.32
S06-19A	19.2896	-155.235	1.2
S06-24A	19.2831	-155.26	0.63
F05-10	19.3169	-155.299	1.35
F05-9-K3	19.3314	-155.302	2.75
F05-11	19.3151	-155.307	1.07
S06-25	19.3094	-155.308	0.82
S06-26	19.3145	-155.312	1.84
S06-27	19.312	-155.313	2.09
S06-35	19.2901	-155.277	0.57
S06-31	19.2781	-155.271	0.65
S06-34	19.2841	-155.28	0.46
S06-31 modified	19.2781	-155.271	0.62
S06-41	19.3103	-155.209	1.35
S06-42A	19.3034	-155.211	1.5
S06-43A	19.2965	-155.214	1.49
S06-44A	19.2901	-155.212	0.8
S06-45	19.2809	-155.209	0.9
S06-46A	19.2769	-155.208	0.67
S06-48A	19.2761	-155.215	0.85
S06-60A	19.2722	-155.252	0.56
S06-63A	19.2716	-155.232	0.64
S06-65A	19.2687	-155.218	0.8
S06-59	19.2787	-155.25	0.8
S06-67A	19.2956	-155.158	0.64
S06-68B	19.3337	-155.209	1.09
S05-23resample	19.3229	-155.296	1.64
F05-15combined	19.3349	-155.275	3.19
F06-5ABcombined	19.3276	-155.275	2.31
F06-14-1	19.3029	-155.306	0.24
S06-61A	19.2722	-155.247	0.7
S06-62A	19.272	-155.24	0.71
S06-66A	19.2981	-155.156	0.45
F4-44-1	19.3246	-155.296	1.64
S06-86A	19.3034	-155.255	1.07
S06-87A	19.3022	-155.249	1.02
S06-89A	19.3031	-155.234	1.37
S06-90A	19.3029	-155.228	0.56
F9-12	19.3609	-155.255	2.66
S09-127	19.2969	-155.156	0.77
F10-115-5	19.4165	-155.245	2.15
F6-7(2010)-2	19.3668	-155.267	5.58
Note:
Lat and Long is Old Hawaiian Datum
Median grain size determined by sieving at whole phi intervals
